1 A computationally tractable birth-death model that  
2 combines phylogenetic and epidemiological data

3 Alexander E. Zarebski<sup>\*1</sup>, Louis du Plessis<sup>1</sup>, Kris V. Parag<sup>2, †</sup> and Oliver G.  
4 Pybus<sup>1, †</sup>

5 <sup>1</sup>Department of Zoology, University of Oxford

6 <sup>2</sup>MRC Centre for Global Infectious Disease Analysis, Imperial College London

7 <sup>†</sup>These authors contributed equally

8 **Abstract**

9 Inferring the dynamics of pathogen transmission during an outbreak is an important  
10 problem in both infectious disease epidemiology and phylodynamics. In mathematical epi-  
11 demiology, estimates are often informed by time-series of infected cases while in phylody-  
12 namics genetic sequences sampled through time are the primary data source. Each data  
13 type provides different, and potentially complementary, insights into transmission. How-  
14 ever inference methods are typically highly specialised and field-specific. Recent studies  
15 have recognised the benefits of combining data sources, which include improved estimates  
16 of the transmission rate and number of infected individuals. However, the methods they  
17 employ are either computationally prohibitive or require intensive simulation, limiting their  
18 real-time utility. We present a novel birth-death phylogenetic model, called TimTam which  
19 can be informed by both phylogenetic and epidemiological data. Moreover, we derive a  
20 tractable analytic approximation of the TimTam likelihood, the computational complexity  
21 of which is linear in the size of the dataset. Using the TimTam we show how key param-  
22 eters of transmission dynamics and the number of unreported infections can be estimated  
23 accurately using these heterogeneous data sources. The approximate likelihood facilitates  
24 inference on large data sets, an important consideration as such data become increasingly  
25 common due to improving sequencing capability.

---

\*For correspondence email: [alexander.zarebski@zoo.ox.ac.uk](mailto:alexander.zarebski@zoo.ox.ac.uk)

## 1 Introduction

Estimating the prevalence of infection and transmission dynamics of an outbreak are central objectives of both infectious disease epidemiology and phylodynamics. In mathematical epidemiology, time series of reported numbers of infections (known as the epidemic curve or time series) are combined with epidemiological models to infer key parameters, such as the basic reproduction number ( $R_0$ ); a fundamental descriptor of transmission dynamics (Brauer et al., 2008; Grassly and Fraser, 2008). In phylodynamics, as applied to infectious disease epidemiology, phylogenies reconstructed from pathogen genetic sequences sampled over the course of an outbreak are used to estimate either the size or growth rate of the infected population (Pybus and Rambaut, 2009; Stadler et al., 2012).

Combining information from multiple data sources has the potential to improve estimates of transmission rates and prevalence (Rasmussen et al., 2011; Moss et al., 2019), however doing so raises substantial challenges (Angelis et al., 2015). Technical challenges and the diversity of the data types used has meant that phylogenetic and epidemiological inference methods have been developed and examined largely in isolation of each other (Parag and Donnelly, 2020; Ypma et al., 2013).

The two main phylodynamic models used to describe the growth of an infectious disease outbreak are the phylogenetic birth-death (BD) model, which estimates the rate of spread of the pathogen (Nee et al., 1994; Kendall, 1948), and the coalescent process, which estimates the effective size of the infected population (Kingman, 1982; Pybus et al., 2000). Within the coalescent framework, a phylogeny reconstructed from sampled sequences is related to the effective size of the infected population, assuming that the fraction of the population sampled is small (Kingman, 1982). This relationship, when interpreted under a suitable dynamical model, allows the inference of epidemic dynamics (Pybus et al., 2001; Volz et al., 2009). Both differential equation and stochastic epidemic models have been fit to sequence data (Volz et al., 2009; Poppinga et al., 2015; Tang et al., 2019), providing estimates of prevalence and  $R_0$ . Gill et al., 2016 introduced an additional way to model effective population sizes by considering the association between effective population size and time-varying covariates.

Rasmussen et al., (2011) showed how combining sequence data with an epidemic time series could allow inference of not just the epidemic size but also its growth parameters. However, this approach treated the epidemic time series as independent of the sequence data, an approximation which only holds when the number of sequences is small relative to the outbreak size. Previously, coalescent models have neglected the informativeness of sequence sampling times, although recent work has found estimates of the effective size could be improved by incorporating sampling times (Karcher et al., 2016; Parag et al., 2020). To the best of our knowledge, no coalescent model so far has utilised both epidemic time series and sequence sampling times.

Within the BD framework, births represent transmission events and deaths the cessation of being infectious (e.g. due to death, isolation or recovery). Stadler, (2010)'s birth-death-sampling (BDS) extension of Kendall's BD model (Kendall, 1948) incorporated serially-sampled sequences, which allowed estimation of the underlying epidemic growth and sampling trends. This approach was extended by Kühnert et al., (2014), who linked the BDS process to a stochastic epidemic (SIR) model under strong simplifying assumptions. The resulting model improved estimates of  $R_0$  and provided the first means of inferring the number of unsampled members of the infected population (via estimates of epidemic prevalence). Deterministic SIR models have also been used in both BD (MacPherson et al., 2020) and coalescent frameworks (Volz et al., 2009).

Vaughan et al., (2019) relaxed the assumptions in Kühnert et al., (2014)'s model using a particle-filter approach for inference. The flexibility of the particle-filter enabled the use of both sequence and epidemic time series data. While the particle-filter represents a comprehensive ap-

74 proach to fusing epidemiological and phylogenetic data, it is computationally intractable, relying  
75 on intensive simulation, which can limit its application. Recent work from Manceau et al., (2020)  
76 and Gupta et al., (2020) developed a numerical scheme for computing the same likelihood (and  
77 so facilitates equivalent estimates). The numerical scheme has a smaller computational overhead,  
78 but requires calculations that have a quadratic computational complexity, i.e., that grow as the  
79 square of the size of the dataset. Moreover, the approximation used can be numerically unstable  
80 under certain conditions.

81 To the best of our knowledge, there is currently no existing phylogenetic inference method,  
82 in either the BD or coalescent frameworks, that can (i) formally combine both epidemiological  
83 and sequence data, (ii) estimate the prevalence of infection and (iii) be practically applied to  
84 large data sets. As sequencing costs continue to decline and large genome sequence datasets  
85 collected over the course of an outbreak become the norm, the need for a tractable solution to  
86 these problems grows. Here we present the first steps towards such a solution by approximating,  
87 and then generalising, the model of Manceau et al., 2020.

88 In this manuscript we describe the **Time-series Integration by Moment Approximation** (Tim-  
89 Tam), a novel approach for incorporating both epidemiological and sequence data at scale. The  
90 novelty of this approach stems from two aspects. First, motivated by a result from Kendall,  
91 (1948) we approximate the prevalence distribution (and the number of unobserved lineages)  
92 with a negative binomial distribution; this approximation allows us to derive an analytic ap-  
93 proximation to the likelihood that has a computational complexity that scales linearly with the  
94 size of the dataset. Consequently, our approach can be applied to much larger data sets than  
95 was previously possible. Second, the mathematical tractability of TimTam allows us to provide  
96 an extension to the sampling models previously considered which more closely represents how  
97 epidemiological data is usually recorded in practice. Since epidemiological data is usually only  
98 available in the form of binned (e.g. daily or weekly) counts, a time series of such observations  
99 align more closely with the data generating process (Wallinga and Teunis, 2004). For example,  
100 if a health centre is unable to report new cases over the weekend one can expect scheduled cases  
101 at the start of the following week. This is in contrast to sequence data, which is usually reported  
102 with the exact sampling date.

## 2 Methods

Birth-death-sampling (BDS) models, as presented in Stadler, (2010) and Stadler et al., (2013), describe sequence data that have either been collected at pre-determined points in time (hereafter scheduled observations), or opportunistically, when cases have presented themselves, (hereafter unscheduled observations). Models such as those considered in Vaughan et al., (2019) and Manceau et al., (2020) incorporate an additional data type in their sampling model, occurrence data, which represents the unscheduled observation (and subsequent removal) of infectious individuals without including them in the reconstructed phylogeny. Such occurrence data may arise e.g. when an individual receives treatment, but the pathogen genome is not sequenced. Unscheduled observations generate a point process of removal events from the infectious population (Stadler et al., 2013). The above suggests a categorisation of observations based on two attributes, (i) whether they were observed at predetermined times (*scheduled* observations) or following a point process (*unscheduled* observations), and (ii) whether the observation is included in the reconstructed phylogeny (a *sequenced* observation), or not (an *unsequenced* observation).

The categorisation above suggests a fourth data type: the scheduled observation of unsequenced (occurrence) data, which corresponds to the removal of multiple individuals from the infectious population at the same time, without incorporating them into the reconstructed phylogeny. There are several benefits to being able to describe such data. First, since epidemiological data are often given as a time series (instead of a point process) this is arguably a more natural way to utilise occurrence data in the transmission process (Wallinga and Teunis, 2004). The same could be said for sequenced samples where there may be multiple samples collected on the same day (Parag et al., 2020). The second benefit is computational. Treating observations as arising from scheduled rather than unscheduled observations simplifies the likelihood, since each scheduled event can account for multiple observations. As sequencing of pathogen genomes becomes more commonplace, the capacity to deal with large data sets becomes increasingly important. As far as we are aware, scheduled occurrence data has not been considered in any phylogenetic inference method. Below we describe this sampling model formally and the TimTam approach to evaluating its likelihood. An implementation of the likelihood is available upon request from the corresponding author.

### Phylogenetic Birth-Death Process

The phylogenetic birth-death process starts with a single infectious individual at the origin time,  $t = 0$ . Infectious individuals “give birth” to new infectious individuals at rate  $\lambda$ , and are removed from the process either through naturally ceasing to be infectious (at rate  $\mu$ , often called the “death” rate), or through being sampled (an observation). Unscheduled sampling of infectious individuals occurs at different rates depending on whether samples are sequenced (at rate  $\psi$ ) or not (at rate  $\omega$ ). Individuals can also be removed in scheduled sampling events. Scheduled sampling occurs at predetermined times when each infectious individual is independently removed with a fixed probability;  $\rho$  for sequenced samples and  $\nu$  for unsequenced samples. An illustrative example is shown in Figure 1. For ease of notation we assume that all samples arising from a scheduled sampling event are either sequenced or not. We denote these times  $r_i$  for the sequenced sampling events and  $u_i$  for the unsequenced ones, and assume these times are known *a priori*, since they are under the control of those observing the system. The parameters of interest in this combined process are  $\theta := (\lambda, \mu, \psi, \rho, \omega, \nu)$ .

Realisations of the process are binary trees with internal nodes corresponding to infection events and terminal nodes representing one of the removal events as shown in Figure 1. Note that we assume the edges of the tree are labelled with their length to ensure that the nodes appear at

149 the correct depth. We refer to the resulting tree of all infected individuals as the *transmission*  
 150 *tree*. The subtree containing only the terminal nodes corresponding to sequenced samples (both  
 151 scheduled and unscheduled) is called the *reconstructed tree*. In practice, the reconstructed tree  
 152 is estimated from pathogen genomes; here we assume the reconstructed tree is known *a priori*.

153 The reconstructed tree can be summarised by its *lineages through time* (LTT) plot, which  
 154 depicts the number of lineages in the tree at each point in time. We define the number of *hidden*  
 155 lineages through time as the count of lineages that appear in the transmission tree but not in the  
 156 reconstructed tree. The LTT and the unscheduled (point process) and scheduled (time series) of  
 157 unsequenced samples can all be reduced to a sequence of events,  $\mathcal{E}_{1:N}$ , starting from the origin  
 158 and moving forward through time up to the present (i.e., the time of the last observation):

$$\mathcal{E}_{1:N} = \{(\Delta t_i, e_i)\}_{i=1\dots N} \quad (1)$$

159 with  $\Delta t_i$  denoting the time since the previous observation and  $e_i$  describing the event that was  
 160 observed at that time:  $e_i \in \{\lambda\text{-event}, \psi\text{-event}, \rho\text{-event}, \omega\text{-event}, \nu\text{-event}\}$ . The sequence of events  
 161 identified from Equation (1) will be used to derive the likelihood of the process.

162 For ease of notation, the time of event number  $i$  is denoted  $t_i$ , so  $t_i := \Delta t_1 + \dots + \Delta t_i$ . The  
 163 value of  $K_i$  is the number of lineages in the reconstructed tree *directly after* the event at time  
 164  $t_i$  and  $H_i$  denotes the number of hidden lineages. Note that while  $K_i$  remains constant between  
 165 observations,  $H(t)$  may change. The changes in the LTT and the number of hidden lineages at  
 166 time  $t_i$  is denoted  $\Delta K_i$  and  $\Delta H_i$ .

167 There are some differences between the process described above and that of (Manceau et al.,  
 168 2020). Manceau et al., 2020 allow for the observation of infectious individuals without removal,  
 169 i.e., allowing them to appear as an unscheduled sample but potentially able to subsequently give  
 170 birth to new infections. Accounting for these so-called *sampled ancestors* introduces an additional  
 171 parameter which is the probability of removal upon sampling (Stadler, 2010; Gavryushkina et al.,  
 172 2014). As mentioned above, the inclusion of scheduled occurrence data is novel, hence is not  
 173 part of the process considered by Manceau et al., (2020) or any other work, as far as we know.

## 174 The Likelihood

175 Here we describe the likelihood function for the process described above and the distribution of  
 176 the number of hidden lineages,  $H(t)$ , conditional upon the observed  $N$  events from Equation (1).  
 177 The joint posterior distribution of these quantities can be factorised as follows:

$$f(\theta, H(t) \mid \mathcal{E}_{1:N}) \propto f(H(t) \mid \mathcal{E}_{1:N}, \theta) f(\mathcal{E}_{1:N} \mid \theta) \pi(\theta). \quad (2)$$

178 with  $\pi(\theta)$  as a prior distribution over the parameters of the process,  $\theta$ . The constant of propor-  
 179 tionality is simply that required to normalise the resulting posterior distribution  $f(\theta, H(t) \mid \mathcal{E}_{1:N})$ .

180 The remaining two terms compose the process likelihood. The first, which is the distribution  
 181 of  $H(t)$ , is calculated incidentally while evaluating  $f(\mathcal{E}_{1:N} \mid \theta)$  as explained below. The second  
 182 term,  $f(\mathcal{E}_{1:N} \mid \theta)$ , is the likelihood of the observed events given the process parameters. While  
 183 each observed event depends on all the prior observations, we can factorise this likelihood into  
 184 sequential terms:

$$f(\mathcal{E}_{1:N} \mid \theta) = \prod_{i=1}^N f(\mathcal{E}_i \mid \mathcal{E}_{1:(i-1)}, \theta) = \prod_{i=1}^N c_i l_i$$

185 where  $c_i$  is the probability that during the interval  $(t_{i-1}, t_i)$  (i.e., between events  $\mathcal{E}_{i-1}$  and  $\mathcal{E}_i$ )  
 186 there was no observed event, and  $l_i$  is the probability of observing event  $e_i$ .

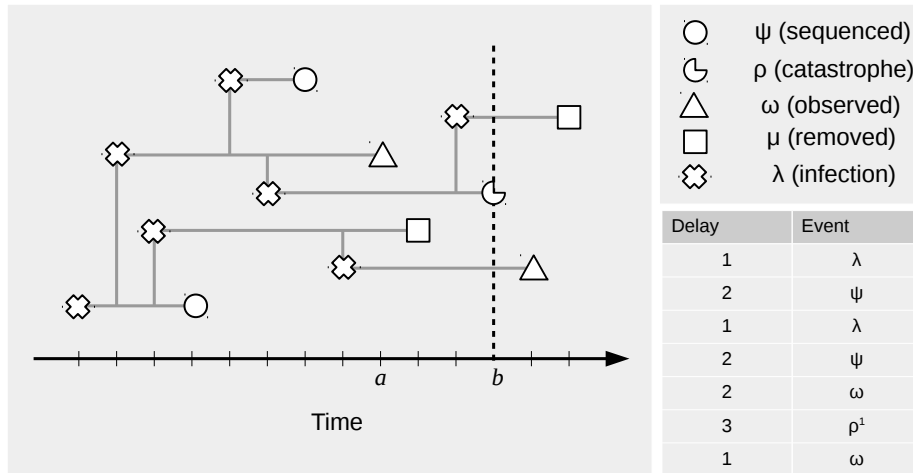

Figure 1: An illustration of birth-death-sampling process and the resulting data set: the tree depicts the BD process with the shapes indicating which events occurred when; each horizontal line corresponds to the time an individual was infectious. The table shows the corresponding data set with the delay between subsequent observations and the observed event after that delay. At time  $a$  there is a  $\omega$ -event, then after a delay of 3 units of time until time  $b$  when there is  $\rho$ -event with one individual sampled, denoted  $\rho^1$ .

187 To describe how many hidden lineages there are at time  $t$ ,  $H(t)$ , we define a generating function  
 188  $M(t, z)$  for the distribution conditional upon events that have been observed by time  $t$ . This is  
 189 defined as

$$M(t, z) = \sum_h \mathbb{P}(H(t) = h | \mathcal{E}_{1:x} \leq t) z^h,$$

190 where we have abused our notation by using  $\mathcal{E}_{1:x} \leq t$  to denote just the events which occur  
 191 at times not after  $t$ . The  $c_i$  and  $l_i$  can be computed using properties of the generating function  
 192  $M(t, z)$ . Further, to indicate the generating function over a particular interval of time, let  $M_i(t, z)$   
 193 denote  $M(t, z)$  for  $t_i \leq t < t_{i+1}$ , i.e., between events  $\mathcal{E}_i$  and  $\mathcal{E}_{i+1}$ . For each of these intervals, we  
 194 can describe  $M_i$  using a PDE derived from the master equations of the process we have described  
 195 above.

196 Since the process starts with only a single infected individual (who appears as the root of  
 197 the tree), by definition  $H(0) = 0$ . Therefore the initial condition of the generating function is  
 198  $M_0(0, z) = 1$ , and the PDEs describing the  $M_i$  are:

$$M_i(t_i, z) = F_i(z) \tag{3}$$

$$\partial_t M_i = (\lambda z^2 - \gamma z + \mu) \partial_z M_i + K_i (2\lambda z - \gamma) M_i. \tag{4}$$

199 Here  $\gamma = \lambda + \mu + \psi + \omega$ , the parameters  $\rho$  and  $\nu$  do not appear in the PDE because they only  
 200 occur in the boundary conditions at the scheduled events. The boundary condition,  $F_i(z)$ , is  
 201 the PGF of  $H$  after the observation at  $t_i$ . The number of lineages in the reconstructed tree,  $K_i$ ,

202 only changes when there is a birth, or a sequenced sample and so is a constant in the PDE. The  
 203 solution during the intervals between observations is<sup>1</sup>

$$M_i(t, z) = F_i(p_0(t_{i+1} - t, z)) \left( \frac{p_1(t_{i+1} - t, z)}{1 - z} \right)^{K_i}. \quad (5)$$

204 The functions  $p_0$  and  $p_1$  are standard results for birth-death-sampling models (see Stadler, (2010))  
 205 and a derivation is given in Supplementary Materials.

206 Before proceeding, we discuss an important property of the solution given in Equation (5): the  
 207 coefficients of the generating function  $M_i$  do not sum to unity for all  $t$ . The normalising constant  
 208 for  $M_i(t_{i+1}, z)$  is the probability,  $c_{i+1}$ , of there having been no event during the preceding interval  
 209 of time. Hence, we can calculate the  $c_{i+1}$  by evaluating  $M_i(t_{i+1}, z)$  at  $z = 1$ . Therefore the  
 210 generating function of the distribution of  $H(t_{i+1}^-)$  (i.e., the limiting distribution of the number of  
 211 hidden distributions prior to an observation) is  $\mathcal{M}_i := M_i(t_{i+1}^-)/c_i$ , where we use the notation  $t^\pm$   
 212 to indicate the left and right limits respectively and the inclusion of the denominator  $c_i$  ensures  
 213 that the coefficients sum to 1.

214 To calculate the PGF of  $H(t_{i+1})$ , (i.e., the PGF conditioning on the observation at time  
 215  $t_{i+1}$ .) we need  $l_{i+1}$ . To do this we consider the changes to the distribution of  $H$  that result from  
 216 observing each possible event. Since  $\lambda$ - and  $\psi$ -events do not influence the number of  $H$ -lineages,  
 217 the PGF does not change:  $M_{i+1}(t_{i+1}) := \mathcal{M}_i(t_{i+1})$ . The likelihood of these events,  $e_i$ , is  $\lambda$  and  
 218  $\psi$  respectively. For a  $\omega$ -event we need to shift the whole distribution of  $H$  and account for the  
 219 unknown number of hidden lineages that could have been sampled, this is achieved by taking the  
 220 partial derivative of the generating function<sup>2</sup>. The likelihood of an  $\omega$ -event is the normalising  
 221 constant after the differentiation:

$$l_{i+1} = \lim_{z \rightarrow 1^-} \omega \partial_z \mathcal{M}_i(t_{i+1}, z), \quad \text{and so} \quad (6)$$

$$M_{i+1}(t_{i+1}) = \frac{\omega}{l_{i+1}} \partial_z \mathcal{M}_i(t_{i+1}, z).$$

222 For a scheduled sampling event, at time  $r$  with removal probability  $\rho$ , we need to account for the  
 223 survival of each of the  $H$ -lineages that were not sampled, those that were, and the number of  
 224 lineages in the reconstructed tree that were not removed during this scheduled sampling. This  
 225 leads to the following likelihood factor and updated PGF:

$$l_{i+1} = (1 - \rho)^{K_{i+1}} \rho^{\Delta K_{i+1}} \lim_{z \rightarrow 1^-} \mathcal{M}_i(t_{i+1}, (1 - \rho)z) \quad \text{and} \quad (7)$$

$$M_{i+1}(t_{i+1}) = \frac{(1 - \rho)^{K_{i+1}} \rho^{\Delta K_{i+1}}}{l_{i+1}} \mathcal{M}_i(t_{i+1}, (1 - \rho)z).$$

226 Last, we include scheduled unsequenced samples, i.e. the observation and simultaneous removal  
 227 of multiple lineages without subsequent inclusion in the reconstructed phylogeny. Previously, we  
 228 noted that a single  $\omega$ -sampling corresponds to differentiating the PGF of  $H$  once. If at time  $u$   
 229 each lineage is sampled with probability  $\nu$  and  $n$  lineages in total are sampled, then we must take  
 230 the  $n$ -th derivative and accumulate a likelihood factor for the removed and non-removed lineages  
 231 of  $(1 - \nu)^K \nu^n$ ; while scaling  $z$  by a factor of  $1 - \nu$  to account for the  $H$ -lineages that were not  
 232 sampled. Using Equations (6) and (7), the likelihood and updated PGF after a  $\nu$ -sample are:

<sup>1</sup>This appears as Proposition 4.1 in Manceau et al., 2020.

<sup>2</sup> Differentiation of the PGF achieves this because it shifts the coefficients of the series and weights them by the number of possible ways in which the sample could have been drawn. For example, consider the term of the series  $h_j z^j$  which then becomes  $j h_j z^{j-1}$  because after the sample the probability of there being  $j - 1$  hidden lineages is the probability there were previously  $j$  and that one of those  $j$  lineages was sampled.

$$\begin{aligned}
 l_{i+1} &= (1 - \nu)^{K_{i+1}} \nu^{\Delta H_{i+1}} \lim_{z \rightarrow 1^-} \partial_z^{\Delta H_{i+1}} \mathcal{M}_i(t_{i+1}, (1 - \nu)z) \quad \text{and} \\
 M_{i+1}(t_{i+1}) &= \frac{(1 - \nu)^{K_{i+1}} \nu^{\Delta H_{i+1}}}{l_{i+1}} \partial_z^{\Delta H_{i+1}} \mathcal{M}_i(t_{i+1}, (1 - \nu)z).
 \end{aligned}
 \tag{8}$$

233 Above we have derived expressions for  $c_i$  and  $l_i$  which allow us to compute the likelihood of  
 234 an observed set of events,  $\mathcal{E}_{1:N}$ . The outline of the likelihood calculation above is similar to  
 235 that of Manceau et al., (2020) but with the addition of scheduled unsequenced samples, and  
 236 greater emphasis on the handling of *repeated* scheduled sequenced sampling. Unfortunately,  
 237 the expressions above are in terms of limits and derivatives of generating functions that are  
 238 difficult to manipulate. As noted by Manceau et al., (2020), the evaluation of these expressions  
 239 becomes increasingly computationally demanding when done numerically and attempts to find a  
 240 simplified expression using computer algebra systems did not yield suitable results. The strategy  
 241 followed in Manceau et al., (2020) was to either solve the differential equations numerically  
 242 or to approximate it with a set of basis functions. The former approach requires truncating  
 243 an infinite linear system of ordinary differential equations (ODEs) and solving it for each time  
 244 interval, an operation which is cubic in the size of the truncated system (due to taking the  
 245 matrix exponential). The latter approach attains quadratic complexity albeit by introducing a  
 246 further approximation. The accuracy of the numerical solution of Manceau et al., (2020) will  
 247 increase initially with the size of the truncated system, but at larger values, numerical error from  
 248 computing the matrix exponential could become significant. The TimTam approach we describe  
 249 below is our novel approach for avoiding these problems; it has a linear complexity and avoids  
 250 the need for any numerical integration.

## 251 An Analytic Approximation

252 To apply this approximation, recall that we can evaluate the full PGF point-wise given the  
 253 boundary condition  $F_i$  (see Equation 3). Moreover, as shown in the Supplementary Materi-  
 254 als, the generating function of the negative binomial (NB) distribution is closed under partial  
 255 derivatives (up to a simple multiplicative constant) and partial derivatives of PGFs can be used  
 256 to calculate the mean and variance of a distribution. Our TimTam model can be described as  
 257 simply replacing the PGF of  $H$  with a NB PGF with equivalent mean and variance whenever  
 258 necessary. Algorithmically this can be expressed in the following steps:

- 259 1. Start at time  $t_i$  with  $M_i$  and solve for  $M_i$  at time  $t_{i+1}$ .
- 260 2. Define  $c_i := M_i(t_{i+1}, 1^-)$ .
- 261 3. Define  $\mathcal{M}_i := M_i/c_i$ .
- 262 4. Define  $\widetilde{\mathcal{M}}_i$  to be the NB approximation to the distribution with PGF  $\mathcal{M}_i$ .
- 263 5. Use  $\widetilde{\mathcal{M}}_i$  to compute the likelihood of  $\mathcal{E}_{i+1}$  and call it  $l_i$ .
- 264 6. Define  $M_{i+1}$  as the PGF of the distribution obtained by conditioning the NB approximation  
265 on  $\mathcal{E}_{i+1}$ .
- 266 7. Increment the log-likelihood by  $\log(c_i l_i)$ .

267 The steps involved only require the evaluation of closed form expressions and the amount of  
 268 computational work is linear in the number of observed events.



269 Our use of a NB moment-matching approximation is not arbitrary. Kendall observed that  
270 the number of lineages descending from a single lineage has a zero-inflated geometric distribu-  
271 tion (Kendall, 1948). Moreover, it is well known that the sum of independent and identically  
272 distributed geometric random variables follows a NB distribution. Our approach of treating the  
273 number of lineages derived from  $n$  individuals as a NB random variable is somewhat motivated  
274 by combining these two properties. Further support for our approximation is obtained by con-  
275 sidering an equivalent BD process, but with the modified total birth rate of  $\lambda n + a$  where  $a$  is a  
276 small offset representing an immigration rate that leads to the removal of the extra (unobserv-  
277 able) zeros. Such processes can be described by NB lineage distributions at all times of their  
278 evolution and are stable to the inclusion of additional event types. (Ycart, 1988; Kapodistria  
279 et al., 2016).

280 It is interesting to note that both partial differentiation by  $z$  and scaling  $z$  by a constant  
281 factor in the PGF of a NB random variable produces another PGF for a NB random variable  
282 with a multiplicative factor. Put another way, the family of NB PGFs is invariant (up to a  
283 multiplicative constant) under the algebraic operations we care about. The significance of this is  
284 that if we assume that the distribution of  $H$  is NB, then conditioning on an event does not require  
285 any further approximation to produce subsequent NB distributions as the initial condition of the  
286 next interval.

## 287 Additional comments

### 288 Conditioning upon observation

289 The likelihood developed above applies to an arbitrary realisation of the birth-death process.  
290 However in practice, the existence of a data set usually means the outbreak has escaped extinc-  
291 tion due to stochastic effects. This generates a survivorship bias i.e. we only ever consider the  
292 likelihood of realisations which generate at least one observation. In the phylogenetic BD litera-  
293 ture, this is readily acknowledged and accounted for by conditioning the process in one of several  
294 ways (Nee et al., 1994; Stadler, 2012)<sup>3</sup>. To adjust for this, one should condition upon there being  
295 at least  $n \geq 1$  observations between the origin and the present. If there were only unscheduled  
296 samples in our data set, existing approaches to conditioning the process against extinction could  
297 easily be applied to this model. Here we do not consider the problem of conditioning the process  
298 against extinction under the repeated scheduled sampling setting.

### 299 Origin time vs TMRCA

300 The definition of the likelihood above assumes that the origin of the phylogeny is known a priori  
301 or is a parameter to be estimated. This is because we need the initial condition  $M_0(0, z) = 1$ .  
302 In practice this is unlikely to be the case as the phylogeny will likely only be known up to the  
303 time of the most recent common ancestor (TMRCA). There are two ways in which this might  
304 be remedied. The first, and simplest, is to treat the origin time as an additional parameter to  
305 be estimated. The second is to set a boundary condition at the TMRCA and to estimate the  
306 distribution of  $H$ .

307 If we were confident that the outbreak stemmed from a single initial case, then the former  
308 method would be more suitable, especially if there was prior knowledge that could constrain  
309 the estimate of the origin time. On the other hand, if we faced substantial uncertainty about  
310 how the outbreak began and sequencing was sparse, i.e., low  $\psi$  and  $\rho$ , then the TMRCA may  
311 be relatively recent and estimating the origin could be particularly challenging. In this case,

---

<sup>3</sup>There are similar results in the mathematical epidemiology literature, however they are less frequently used, e.g. (Mercer et al., 2011).

312 the latter approach may be more suitable. This would involve estimating the distribution of  
313  $H(t_{\text{TMRCA}})$  and hence its generating function  $M_1(t_{\text{TMRCA}}, z)$ , presumably from the family of  
314 NB distributions.

315 We have presented the log-likelihood in terms of the assumption of a known origin time, be-  
316 cause that is a more mathematically convenient approach, however the most appropriate method  
317 will depend on the types of questions to be answered and the potential availability of prior in-  
318 formation to inform the estimate of the origin time.

### 319 3 Results

#### 320 Comparison with existing results

321 In this section we validate and compare our TimTam approach to the method from Manceau  
322 et al., (2020), hereafter called the Manceau algorithm. Figure 2 shows the the log-likelihood  
323 function evaluated under the TimTam approach and the Manceau algorithm, for 40 simulated  
324 data sets. The simulation used the parameters given in Table 1 was repeated to get a range  
325 of sample sizes from 5 to 200 observed events (which includes both births and samples). Both  
326 methods produce very similar log-likelihood values with the TimTam approach explaining 99%  
327 of the variation in the Manceau algorithm values under a linear model.

328 Since the Manceau algorithm requires a truncation parameter to be specified, we first obtained  
329 sensible values on a per simulation basis by increasing this value until the log-likelihood changed  
330 by less than 0.1% if the truncation parameter was incremented further. The resulting truncation  
331 parameters are shown in Supplementary Figure 1. The full details regarding how the simulated  
332 data were generated, how the benchmarks where evaluated and how the truncation parameter  
333 for the Manceau algorithm was selected are given in the Supplementary Materials.

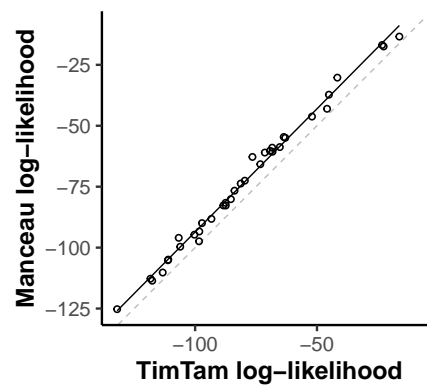

Figure 2: The value of the log-likelihood using the TimTam approximation and the numerical scheme from Manceau et al., (2020). The values are in good agreement with an  $R^2$  of 0.99. The solid black line shows a linear model fit to the data and the grey dashed line follows  $y = x$ .

334 To understand the computational efficiency of our new approach, we recorded the time re-  
335 quired to evaluate the log-likelihood on each of the data sets considered above. In these simu-  
336 lations we selected the truncation parameter of the Manceau *et al* algorithm before we estimated  
337 the evaluation time of the likelihood so that this computation was not included as part of the  
338 evaluation time. The average times to evaluate the likelihood are shown in Figure 3. For Tim-  
339 Tam the evaluation time grows approximately linearly with the size of the dataset,  $\propto n^{1.08}$  where  
340 the 95% CI on the exponent is (1.07,1.10). On the other hand, for Manceau et al., (2020)'s nu-  
341 merical scheme the evaluation time grows approximately quadratically,  $\propto n^{2.10}$  CI (1.82,2.38).  
342 In addition to the improvement in computational complexity, the average evaluation times over  
343 the example data sets are orders of magnitude smaller for TimTam, which takes less than a  
344 millisecond in comparison to the several seconds required by the implementation presented in

345 Manceau et al., (2020). We caution against reading too much into the absolute average computa-  
346 tion times, since we used Haskell to implement our method, whereas Manceau et al., (2020) used  
347 a combination of C and Python, hence it is likely that the faster computation time is a feature  
348 of the programming language used and not the algorithm (both implementations are available  
349 online). Nonetheless, the computational complexities are features of the respective algorithms  
350 and means that the TimTam approach will outperform the Manceau algorithm for large datasets,  
351 regardless of the implementation.

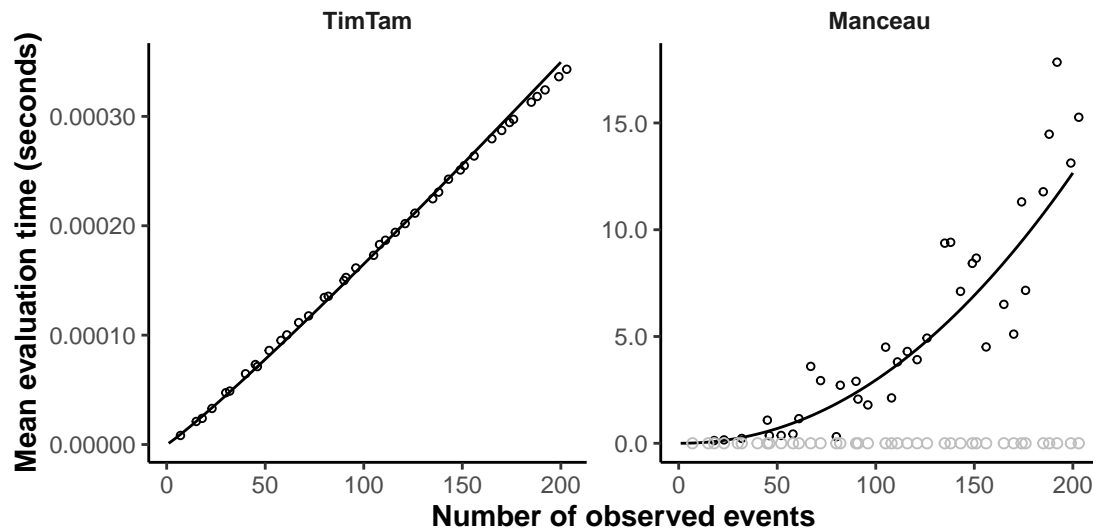

Figure 3: The average time taken to evaluate the likelihood grows approximately linearly with the number of data points:  $\propto n^{1.08}$  (1.07,1.10) using TimTam while the algorithm from Manceau *et al* (2020) has approximately quadratic growth  $\propto n^{2.10}$  (1.82,2.38). The grey points in the second panel show the TimTam values again on the same scale.

## 352 Large data set example

353 Having validated TimTam against the Manceau algorithm, we now showcase our approach as an  
354 estimation scheme that merges all the data types considered in this manuscript. We used the  
355 parameters listed in Table 2 to generate a larger simulation. To show the effect of the simulation  
356 length and the number of observations on statistical power, we truncated our simulation at  
357 two timepoints,  $t = 12$  and  $t = 16$ . The numbers of observations of each type in each of the  
358 two partial datasets are shown in Table 3. Figure 4 shows cross-sections of the TimTam log-  
359 likelihood function generated by fixing the parameters and then varying each element of the  
360 parameter vector individually to explore the surface. This was done using the data from  $t = 16$   
361 in the simulation centered about two sets of parameters: those used in the simulation and the  
362 maximum-likelihood parameter estimates, obtained by numerically optimising the log-likelihood  
363 function while fixing the death rate ( $\mu$ ) to its true value. The log-likelihood cross-sections for  
364 the datasets truncated at  $t = 12$  is shown in Supplementary Figures 2.

365 We also investigated how well TimTam estimates the prevalence of hidden lineages through  
366 time. Figure 5 shows the number of hidden lineages in the simulation at various snapshots,  
367 together with the estimated solution to the filtering problem, i.e., estimation of the prevalence

368 given the incomplete data available at that point in the simulation.

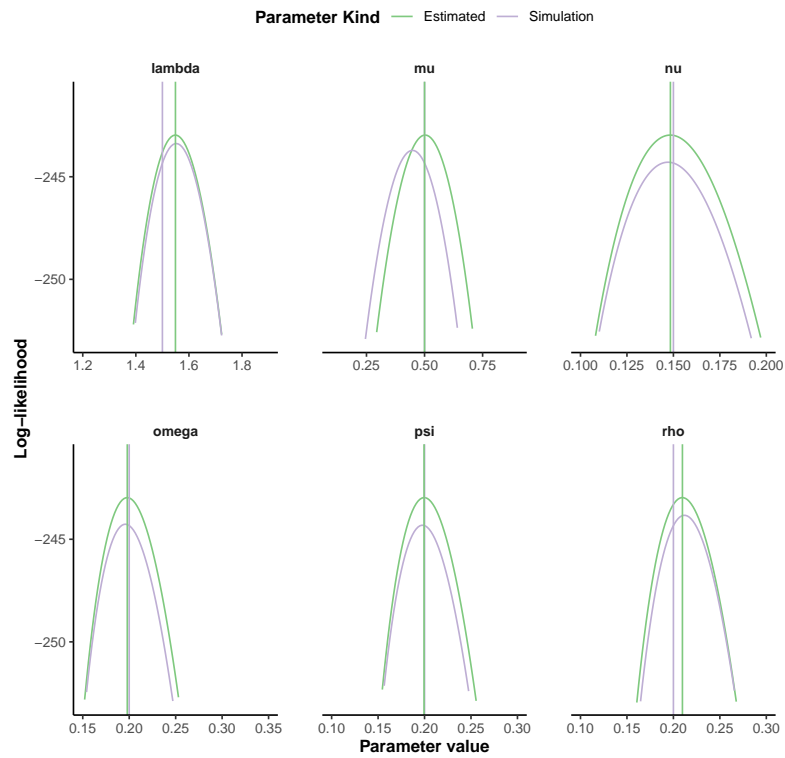

Figure 4: Cross sections of the log-likelihood function taken about the parameter values used in the simulation (lilac) and the estimated values (green), both of which are indicated by vertical lines, given the data that was available at  $t = 16$ .

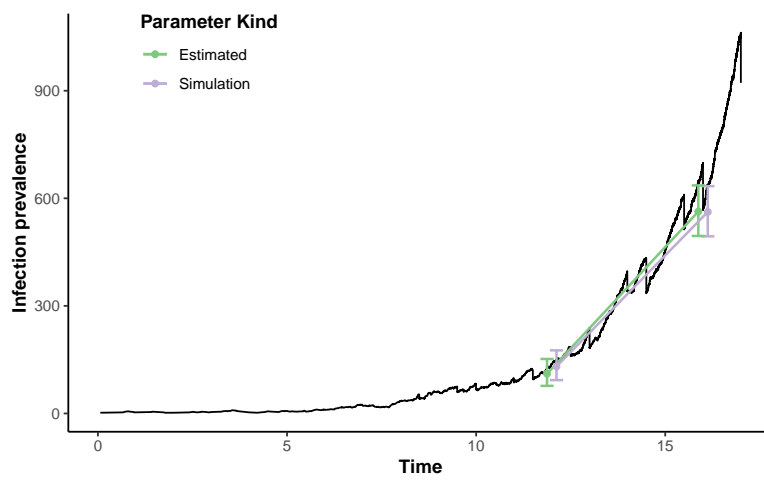

Figure 5: The LTT plot of the simulated data set and the estimates of the prevalence generated at a couple points in the simulation (based on only the data prior to that point in time) using either the “true” parameters responsible for the simulated data or the estimated values conditional upon the data up to that point in the simulation.

## 369 4 Discussion

370 We have described an analytic approximation, called TimTam, for the likelihood of a birth-death-  
371 sampling model which can also describe *scheduled data* i.e. cohort sampling at pre-determined  
372 times. TimTam can be used with both sequenced and unsequenced samples, i.e., the observations  
373 can either be included in the reconstructed tree, or as occurrence data. Our approach generalises  
374 previous birth-death estimation frameworks by accommodating and exploiting more data types  
375 than have been previously considered and makes it possible to scale existing analyses to larger  
376 data sets.

377 Our work is a step towards more flexible time series-based approaches to phylodynamics,  
378 where samples from multiple lineages are considered contemporaneously. This extends the more  
379 common point-process based paradigm in which lineages are sampled continuously through time  
380 and therefore must be considered individually. In addition, the TimTam likelihood provides an  
381 estimate of the distribution of the final prevalence of infection, allowing both the estimation of  
382 summary statistics such as  $R_0$  and the total number of cases. Comparison of TimTam to existing  
383 algorithms on small to moderate sized data sets suggests this is a faithful representation of the  
384 true likelihood function and that the empirical complexity behaves as expected.

385 The strength of TimTam lies in its use of moment matching. This simplifying assumption  
386 allowed us to extend the existing observation models to include the scheduled observation of  
387 unsequenced infections. The computational efficiency means that even when we integrate these  
388 heterogeneous data sources, our framework remains tractable even for large datasets. Taken  
389 together this means phylodynamics can utilise a greater amount and variety of data generated  
390 by surveillance and sequencing efforts, both of which are becoming increasingly common in  
391 contemporary epidemiology. Moreover, we anticipate this underlying approach will allow us to  
392 generate analogous approximations for other phylodynamic models.

393 At present, we cannot provide rigorous bounds on the error introduced by this approximation  
394 (although work is underway on this). However, based on the motivating work from Kendall,  
395 (1948), we conjecture that if the probability of extinction becomes large, the zero inflation in  
396 the geometric distributions describing the number of descending lineages might become an issue.  
397 Since our focus is on large datasets, which will describe established epidemics, we suspect that  
398 in practice this situation will rarely arise. Additionally, as the death rate increases, the power of  
399 birth-death models as an inference tool is naturally limited by a lack of data (Kubo and Iwasa,  
400 1995; Pyron and Burbink, 2013).

401 If this method is to be used in small outbreaks or, when the reproduction number is low,  
402 sensitivity analyses will be necessary to check the fidelity of the NB approximation, as in this  
403 situation the zero-inflation lost in our approximation may become substantial. Moreover, we  
404 have neither examined the conditions necessary for statistical identifiability of the parameters  
405 nor adapted our model likelihood to condition it against extinction (Stadler, 2012; Parag and  
406 Pybus, 2018). Calculating extinction probabilities for this model is complicated by the iterated  
407 scheduled sampling events and the unsequenced samples.

408 Our work echoes the frameworks of Vaughan et al., 2019 and Manceau et al., 2020, but trades  
409 some generality for simplicity and tractability. Specifically, Vaughan et al., 2019 presented a  
410 particle filtering method that can be applied more generally, while Manceau et al., 2020 derived  
411 a complete posterior predictive distribution of prevalence over time, which allows the optimal  
412 study of historical transmission. While the former is able to describe a greater variety of birth-  
413 death processes and the latter can be used to estimate additional properties of the processes  
414 considered, there are substantial limitations of scalability in both. While TimTam may not  
415 match the current level of generality in Vaughan et al., 2019 or the rigour of Manceau et al., 2020,  
416 our method provides a computationally efficient method for handling diverse data types that is

417 scalable to modern datasets. We are pursuing the aggregation of point-process observations into  
418 a time series which provides a closer link to how epidemiological data is usually recorded where  
419 it is typically available at a daily or weekly resolution. Moreover, this leads to improvements in  
420 performance for large datasets as multiple data points can be handled in a single expression. As  
421 the availability of phylogenetic data (derived from sequences or contact tracing) increases and  
422 the size of these data grows, such approximation schemes will become increasingly valuable.



Table 1: The parameters used to simulate the data sets for the empirical investigation of the computational complexity.

| Parameter | Description                              | Value |
|-----------|------------------------------------------|-------|
| $\lambda$ | Birth rate                               | 1.5   |
| $\mu$     | Death rate                               | 0.3   |
| $\psi$    | Sequenced sampling rate                  | 0.3   |
| $\rho$    | Scheduled sequenced sampling probability | 0.5   |
| $r$       | Scheduled sequenced sampling time        | 6     |
| $\omega$  | Unsequenced sampling rate                | 0.3   |
|           | Simulation duration                      | 6     |

Table 2: The parameters used to simulate the large data set.

| Parameter | Description                                | Value                                               |
|-----------|--------------------------------------------|-----------------------------------------------------|
| $\lambda$ | Birth rate                                 | 1.5                                                 |
| $\mu$     | Death rate                                 | 0.5                                                 |
| $\psi$    | Sequenced sampling rate                    | 0.2                                                 |
| $\rho$    | Scheduled sequenced sampling probability   | 0.2                                                 |
| $r_i$     | Scheduled sequenced sampling times         | {2.5, 4, 5.5, 7, 8.5, 10, 11.5, 13, 14.5, 16, 17.5} |
| $\omega$  | Unsequenced sampling rate                  | 0.2                                                 |
| $\nu$     | Scheduled unsequenced sampling probability | 0.15                                                |
| $u_i$     | Scheduled unsequenced sampling times       | {2, 3.5, 5, 6.5, 8, 9.5, 11, 12.5, 14, 15.5, 17}    |
|           | Simulation duration                        | 17                                                  |
|           | Inference times                            | {12, 16}                                            |

Table 3: The number of events that had been observed at each point in the simulation where inference was carried out.

| Observation time | Number of observed events |
|------------------|---------------------------|
| 12               | 315                       |
| 16               | 1415                      |

## <sup>423</sup> 5 Acknowledgements

<sup>424</sup> AEZ, OGP and LdP are supported by The Oxford Martin Programme on Pandemic Genomics.  
<sup>425</sup> KVP is funded under grant reference MR/R015600/1 by the UK Medical Research Council  
<sup>426</sup> (MRC) and the UK Department for International Development (DFID)

## 427 References

- 428 Angelis, Daniela De et al. (2015). “Four key challenges in infectious disease modelling using data  
429 from multiple sources”. In: *Epidemics* 10. Challenges in Modelling Infectious Disease Dynam-  
430 ics, pp. 83–87. ISSN: 1755-4365. DOI: <https://doi.org/10.1016/j.epidem.2014.09.004>.  
431 URL: <http://www.sciencedirect.com/science/article/pii/S175543651400053X>.
- 432 Brauer, Fred, Pauline van den Driessche, and Jianhong Wu (2008). *Mathematical Epidemiology*.  
433 Springer, Berlin, Heidelberg.
- 434 Gavryushkina, Alexandra et al. (2014). “Bayesian Inference of Sampled Ancestor Trees for Epi-  
435 demiology and Fossil Calibration”. In: *PLoS Comput Biol* 10.12, e1003919. DOI: 10.1371/  
436 journal.pcbi.1003919. URL: <http://dx.doi.org/10.1371/journal.pcbi.1003919>  
437 (visited on 08/27/2015).
- 438 Gill, Mandev S. et al. (2016). “Understanding Past Population Dynamics: Bayesian Coalescent-  
439 Based Modeling with Covariates”. In: *Systematic Biology* 65.6, pp. 1041–1056. ISSN: 1063-  
440 5157.
- 441 Grassly, Nicholas C. and Christophe Fraser (2008). “Mathematical models of infectious disease  
442 transmission”. en. In: *Nature Reviews Microbiology* 6.6, pp. 477–487. ISSN: 1740-1526. DOI:  
443 10.1038/nrmicro1845. URL: [http://www.nature.com/nrmicro/journal/v6/n6/full/  
444 nrmicro1845.html](http://www.nature.com/nrmicro/journal/v6/n6/full/nrmicro1845.html) (visited on 12/22/2015).
- 445 Gupta, Ankit et al. (2020). “The probability distribution of the reconstructed phylogenetic tree  
446 with occurrence data”. In: *Journal of Theoretical Biology* 488, p. 110115. ISSN: 0022-5193.  
447 DOI: <https://doi.org/10.1016/j.jtbi.2019.110115>. URL: <http://www.sciencedirect.com/science/article/pii/S0022519319304849>.
- 448 Kapodistria, S, T Phung-Duc, and J Resing (2016). “Linear birth/immigration-death process  
449 with binomial catastrophes”. In: *Prob. Eng. Inform. Sciences* 30, pp. 79–111.
- 450 Karcher, M, J Palacios, T Bedford, et al. (2016). “Quantifying and Mitigating the Effect of  
451 Preferential Sampling on Phylodynamic Inference”. In: *PLoS Comp. Bio* 12.3.
- 452 Kendall, David G. (1948). “On the Generalized “Birth-and-Death” Process”. In: *The Annals of*  
453 *Mathematical Statistics*. DOI: 10.1214/aoms/1177730285.
- 454 Kingman, J (1982). “On the Genealogy of Large Populations”. In: *J. Appl. Prob* 19, pp. 27–43.
- 455 Kubo, T and Y Iwasa (1995). “Inferring the Rates of Branching and Extinction from Molecular  
456 Phylogenies”. In: *Evolution* 49.4, pp. 694–704.
- 457 Kühnert, D, T Stadler, T Vaughan, et al. (2014). “Simultaneous reconstruction of evolutionary  
458 history and epidemiological dynamics from viral sequences with the birth – death SIR model”.  
459 In: *J. R. Soc. Interface* 11.20131106.
- 460 MacPherson, Ailene et al. (2020). “A General Birth-Death-Sampling Model for Epidemiology  
461 and Macroevolution”. In: *bioRxiv*. DOI: 10.1101/2020.10.10.334383. URL: [https://www.  
462 biorxiv.org/content/early/2020/10/11/2020.10.10.334383](https://www.biorxiv.org/content/early/2020/10/11/2020.10.10.334383).
- 463 Manceau, Marc et al. (2020). “The probability distribution of the ancestral population size  
464 conditioned on the reconstructed phylogenetic tree with occurrence data”. In: *Journal of*  
465 *Theoretical Biology*, p. 110400. ISSN: 0022-5193. DOI: [https://doi.org/10.1016/j.  
466 jtbi.2020.110400](https://doi.org/10.1016/j.jtbi.2020.110400). URL: [http://www.sciencedirect.com/science/article/pii/  
467 S0022519320302551](http://www.sciencedirect.com/science/article/pii/S0022519320302551).
- 468 Mercer, G. N., K. Glass, and N. G. Becker (2011). “Effective reproduction numbers are commonly  
469 overestimated early in a disease outbreak”. In: *Statistics in Medicine* 30.9, pp. 984–994. DOI:  
470 10.1002/sim.4174.
- 471 Moss, Robert et al. (2019). “Accounting for Healthcare-Seeking Behaviours and Testing Practices  
472 in Real-Time Influenza Forecasts”. In: *Tropical Medicine and Infectious Disease* 4.1. ISSN:  
473 2414-6366. DOI: 10.3390/tropicalmed4010012.
- 474

- 475 Nee, S, R May, and P Harvey (1994). “The Reconstructed Evolutionary Process”. In: *Phil Trans*  
476 *R Soc B* 344, pp. 305–11.
- 477 Parag, K and C Donnelly (2020). “Adaptive Estimation for Epidemic Renewal and Phylogenetic  
478 Skyline Models”. In: *Syst. Biol* syaa035.
- 479 Parag, Kris V and Oliver G Pybus (2018). “Exact Bayesian inference for phylogenetic birth-  
480 death models”. In: *Bioinformatics* 34.21, pp. 3638–3645. ISSN: 1367-4803. DOI: 10.1093/  
481 bioinformatics/bty337. eprint: [https://academic.oup.com/bioinformatics/article-](https://academic.oup.com/bioinformatics/article-pdf/34/21/3638/26146996/bty337.pdf)  
482 [pdf/34/21/3638/26146996/bty337.pdf](https://academic.oup.com/bioinformatics/article-pdf/34/21/3638/26146996/bty337.pdf). URL: [https://doi.org/10.1093/bioinformatics/  
483 bty337](https://doi.org/10.1093/bioinformatics/bty337).
- 484 Parag, Kris V, Louis du Plessis, and Oliver G Pybus (2020). “Jointly Inferring the Dynamics  
485 of Population Size and Sampling Intensity from Molecular Sequences”. In: *Molecular Biology*  
486 *and Evolution* 37.8, pp. 2414–2429. ISSN: 0737-4038. DOI: 10.1093/molbev/msaa016. eprint:  
487 <https://academic.oup.com/mbe/article-pdf/37/8/2414/33564924/msaa016.pdf>. URL:  
488 <https://doi.org/10.1093/molbev/msaa016>.
- 489 Poppinga, Alex et al. (2015). “Inferring Epidemiological Dynamics with Bayesian Coalescent In-  
490 ference: The Merits of Deterministic and Stochastic Models”. In: *Genetics* 199.2, pp. 595–607.  
491 ISSN: 0016-6731. DOI: 10.1534/genetics.114.172791. eprint: [https://www.genetics.org/  
492 content/199/2/595.full.pdf](https://www.genetics.org/content/199/2/595.full.pdf). URL: <https://www.genetics.org/content/199/2/595>.
- 493 Pybus, Oliver G. and Andrew Rambaut (2009). “Evolutionary analysis of the dynamics of viral  
494 infectious disease”. en. In: *Nature Reviews Genetics* 10.8, pp. 540–550. ISSN: 1471-0056. DOI:  
495 10.1038/nrg2583. URL: [http://www.nature.com/nrg/journal/v10/n8/abs/nrg2583.  
496 html](http://www.nature.com/nrg/journal/v10/n8/abs/nrg2583.html) (visited on 11/06/2016).
- 497 Pybus, Oliver G., Andrew Rambaut, and Paul H. Harvey (2000). “An Integrated Framework  
498 for the Inference of Viral Population History From Reconstructed Genealogies”. In: *Genetics*  
499 155.3, pp. 1429–1437. ISSN: 0016-6731. eprint: [https://www.genetics.org/content/155/  
500 3/1429.full.pdf](https://www.genetics.org/content/155/3/1429.full.pdf). URL: <https://www.genetics.org/content/155/3/1429>.
- 501 Pybus, Oliver G. et al. (2001). “The Epidemic Behavior of the Hepatitis C Virus”. In: *Sci-*  
502 *ence* 292.5525, pp. 2323–2325. DOI: 10.1126/science.1058321. URL: [https://science.  
503 sciencemag.org/content/292/5525/2323](https://science.sciencemag.org/content/292/5525/2323).
- 504 Pyron, R and F Burbink (2013). “Phylogenetic Estimates of Speciation and Extinction Rates  
505 for Testing Ecological and Evolutionary Hypotheses”. In: *Trends in Ecology and Evolution*  
506 28.12, pp. 729–36.
- 507 Rasmussen, David A., Oliver Ratmann, and Katia Koelle (2011). “Inference for Nonlinear Epi-  
508 demiological Models Using Genealogies and Time Series”. In: *PLOS Computational Biology*  
509 7.8, pp. 1–11. DOI: 10.1371/journal.pcbi.1002136. URL: [https://doi.org/10.1371/  
510 journal.pcbi.1002136](https://doi.org/10.1371/journal.pcbi.1002136).
- 511 Stadler, T, R Kouyos, V von Wyl, et al. (2012). “Estimating the Basic Reproductive Number  
512 from Viral Sequence Data”. In: *Mol. Biol. Evol* 29.1, pp. 347–57.
- 513 Stadler, T et al. (2013). “Birth-death Skyline Plot reveals Temporal Changes of Epidemic Spread  
514 in HIV and Hepatitis C Virus (HCV)”. In: *PNAS* 110.1, pp. 228–33.
- 515 Stadler, Tanja (2010). “Sampling-through-time in birth-death trees”. In: *Journal of Theoretical*  
516 *Biology* 267.3, pp. 396–404. ISSN: 0022-5193. DOI: [https://doi.org/10.1016/j.jtbi.  
517 2010.09.010](https://doi.org/10.1016/j.jtbi.2010.09.010).
- 518 — (2012). “How Can We Improve Accuracy of Macroevolutionary Rate Estimates?” In: *System-*  
519 *atic Biology* 62.2, pp. 321–329. DOI: 10.1093/sysbio/sys073.
- 520 Tang, Mingwei et al. (2019). “Fitting stochastic epidemic models to gene genealogies using linear  
521 noise approximation”. In: *arXiv*. URL: <https://arxiv.org/abs/1902.08877>.

- 522 Vaughan, Timothy G et al. (2019). “Estimating Epidemic Incidence and Prevalence from Ge-  
523 nomic Data”. In: *Molecular Biology and Evolution* 36.8, pp. 1804–1816. DOI: 10 . 1093 /  
524 molbev/msz106.
- 525 Volz, Erik M. et al. (2009). “Phylodynamics of Infectious Disease Epidemics”. In: *Genetics* 183.4,  
526 pp. 1421–1430. DOI: 10.1534/genetics.109.106021.
- 527 Wallinga, Jacco and Peter Teunis (2004). “Different Epidemic Curves for Severe Acute Res-  
528 piratory Syndrome Reveal Similar Impacts of Control Measures”. In: *American Journal of*  
529 *Epidemiology* 160.6, pp. 509–516. ISSN: 0002-9262. DOI: 10.1093/aje/kwh255. URL: <https://doi.org/10.1093/aje/kwh255>.
- 530
- 531 Ycart, B (1988). “A characteristic property of linear growth birth and death processes”. In:  
532 *Sankhya A* 50, pp. 184–9.
- 533 Ypma, R, W van Ballegooijen, and J Wallinga (2013). “Relating Phylogenetic Trees to Trans-  
534 mission Trees of Infectious Disease Outbreaks”. In: *Genetics* 195, pp. 1055–62.
