Full title: A computationally tractable birth-death model that combines phylogenetic and epidemiological data

Short title: A birth-death model informed by phylogenetic and epidemiological data

Alexander E. Zarebski<sup>1\*</sup>, Louis du Plessis<sup>1</sup>, Kris V. Parag<sup>2†</sup>, Oliver G. Pybus<sup>1†</sup>,

<sup>1</sup> Department of Zoology, University of Oxford

<sup>2</sup> MRC Centre for Global Infectious Disease Analysis, Imperial College London

†These authors contributed equally to this work.

\* Corresponding author: [alexander.zarebski@zoo.ox.ac.uk](mailto:alexander.zarebski@zoo.ox.ac.uk)

## Abstract

Inferring the dynamics of pathogen transmission during an outbreak is an important problem in both infectious disease epidemiology. In mathematical epidemiology, estimates are often informed by time series of confirmed cases, while in phylodynamics genetic sequences of the pathogen, sampled through time, are the primary data source. Each data type provides different, and potentially complementary, insight; recent studies have recognised that combining data sources can improve estimates of the transmission rate and number of infected individuals. However, inference methods are typically highly specialised and field-specific and are either computationally prohibitive or require intensive simulation, limiting their real-time utility.

We present a novel birth-death phylogenetic model and derive a tractable analytic approximation of its likelihood, the computational complexity of which is linear in the size of the dataset. This approach combines epidemiological and phylodynamic data to produce estimates of key parameters of transmission dynamics and the number of unreported infections. Using simulated data we show (a) that the approximation agrees

well with existing methods, (b) validate the claim of linear complexity and (c) explore robustness to model misspecification. This approximation facilitates inference on large datasets, which is increasingly important as large genomic sequence datasets become commonplace.

## Author summary

Mathematical epidemiologists typically studies time series of cases, ie the *epidemic curve*, to understand the spread of pathogens. Genetic epidemiologists study similar problems but do so using measurements of the genetic sequence of the pathogen which also contain information about the transmission process. There have been many attempts to unite these approaches so that both data sources can be utilised. However, striking a suitable balance between model flexibility and fidelity, in a way that is computationally tractable, has proven challenging; there are several competing methods but for large datasets they are intractable. As sequencing of pathogen genomes becomes more common, and an increasing amount of epidemiological data is collected, this situation will only be exacerbated. To bridge the gap between the time series and genomic methods we developed an approximation scheme, called TimTam, which can accurately and efficiently estimate key features of an epidemic such as the prevalence of the infection and the effective reproduction number, ie how many people are currently infected and the degree to which the infection is spreading.

## Introduction

Estimating the prevalence of infection and transmission dynamics of an outbreak are central objectives of both infectious disease epidemiology and phylodynamics. In mathematical epidemiology, a time series of reported infections (known as the epidemic curve) is combined with epidemiological models to infer key parameters, such as the basic reproduction number,  $\mathcal{R}_0$ , which is a fundamental descriptor of transmission potential [21, 53]. In phylodynamics, as applied to infectious disease epidemiology, phylogenies reconstructed from pathogen genetic sequences sampled over the course of an outbreak are used to estimate the size and/or growth rate of the infected population

(eg [7,30]).

Combining data from multiple sources has the potential to improve estimates of transmission rates and prevalence [9,22,33]. However doing so raises substantial technical challenges [23]. As a result phylogenetic and epidemiological inference methods have been developed and examined largely in isolation of each other [38,46].

The two main frameworks for phylodynamic inference use the phylogenetic birth-death (BD) model, which estimates the rate of spread of the pathogen (eg [29,39]), and the coalescent process, which estimates the effective size of the infected population (eg [26,45]). Within the coalescent framework, a phylogeny reconstructed from sampled sequences is related to the effective size of the infected population and assumes that the fraction of the population that has been sampled is small [26]. This relationship, when interpreted under a suitable dynamical model, allows the inference of epidemic dynamics [16,17]. Both deterministic and stochastic epidemic models have been fitted to sequence data [16,18,55], providing estimates of prevalence and  $\mathcal{R}_0$ . [14] introduced an additional way to model effective population sizes, by considering the association between effective population size and time-varying covariates. [33] showed that combining sequence data with an epidemic time series could allow inference of not just the epidemic size but also its growth parameters. However, this approach treated the epidemic time series as being independent of the sequence data, an approximation which only holds when the number of sequences is small relative to the outbreak size. Previously, coalescent models have neglected the informativeness of sequence sampling times, although recent work has found estimates of the effective size can be improved substantially by incorporating sampling times (eg [27,42]).

In the BD framework, births represent transmission events and deaths represent cessation of being infectious, eg due to death, isolation or recovery [50]. [48] extended this by modelling serially-sampled sequences as another type of death event. This approach was extended by [25], who linked the BD process to a stochastic epidemic (SIR) model under strong simplifying assumptions. The resulting model improved estimates of  $\mathcal{R}_0$  and provided the first means of inferring the number of unsampled members of the infected population (via estimates of epidemic prevalence). Deterministic SIR models have also been used in both BD [11] and coalescent frameworks [16].

[51] relaxed the assumptions in [25]’s model. This was made possible via the use of a particle-filter approach which enabled joint analysis of both sequence and epidemic time series data. While the particle-filter represents a comprehensive approach to fusing epidemiological and phylogenetic data, it is computationally intractable, relying on intensive simulation, which can limit its application. Data augmentation also provides a powerful approach to the inference problem, but again relies on intensive simulation [3].

Recently, [49] and [47] developed numerical schemes for computing the same likelihood, thereby facilitating equivalent estimation. Their methods have a smaller computational overhead, but still requires calculations that have a quadratic computational complexity, ie grow with the square of the size of the dataset. Moreover, the approximation used can be numerically unstable under certain conditions [1].

To the best of our knowledge, there is currently no existing phylogenetic inference method, in either the BD or coalescent frameworks, that can (i) formally combine both epidemiological and sequence data, (ii) estimate the prevalence of infection and growth rate, and (iii) be applied practically to large datasets. As sequencing costs continue to decline and large genome sequence datasets collected over the course of an outbreak become the norm, the need for a tractable solution to these problems grows [2]. Here we present the first steps towards such a solution by approximating, and then modifying, the model of [49].

In this manuscript we describe a novel birth-death-sampling model tailored for use in estimating the reproduction number and prevalence of infection in an epidemic. We start by reviewing existing sampling models for birth-death processes and derive a missing sampling model which has a natural interpretation in epidemiology, where data is usually only available in the form of binned (eg daily or weekly) counts. For example, if a health care provider is unable to report new cases over the weekend one might expect an aggregated number of cases to be reported at the start of the following week. This is in contrast to sequence data, which is often reported with the exact sampling date.

With several simulation studies we demonstrate empirically that our approximation (a) agrees with the output of an existing numerical scheme, (b) has linear complexity, considerably improving on existing computational approaches, which grow quadratically with the size of the data set, and (c) even with aggregated (binned) data, key parameters can still be recovered. Finally, we discuss the practical applications and

benefits of TimTam and the limitations of our approach. 74

## Methods 75

Birth-death-sampling models are used to describe sequence data that have been either 76  
collected at predetermined points in time, hereafter *scheduled observations*, or 77  
opportunistically, ie when cases have presented themselves, hereafter *unscheduled* 78  
*observations* [29, 48]. The relationship between these sequences is described by the 79  
reconstructed phylogeny. The models of [51] and [49] consider an additional data type, 80  
which they term *occurrence data*, that represents unscheduled observation of infectious 81  
individuals without their inclusion in the reconstructed phylogeny. Such occurrence 82  
data may arise, for example, when an individual tests positive for infection but the 83  
pathogen genome is not sequenced. 84

We categorise observations based on two attributes, (i) whether the infected 85  
individuals were observed at predetermined times (scheduled observations) or follow a 86  
point process (unscheduled observations), and (ii) whether the observed cases were 87  
included in the reconstructed phylogeny (a *sequenced* observation), or not (an 88  
*unsequenced* observation). 89

This categorisation suggests an additional data type: the scheduled observation of 90  
unsequenced cases, which corresponds to the removal of multiple individuals from the 91  
infectious population at the same time, without incorporating them into the 92  
reconstructed phylogeny. There are several benefits to being able to incorporate such 93  
data. First, since epidemiological data are often given as a time series (instead of a 94  
point process) this is arguably a more natural way to utilise occurrence data in the 95  
estimation process [12]. The same could be said for the sequenced samples in instances 96  
when multiple samples are collected on the same day [27]. The second benefit is 97  
computational. Modelling observations as scheduled rather than unscheduled simplifies 98  
the likelihood, because a single scheduled observation can account for multiple 99  
unscheduled observations. As far as we are aware, scheduled unsequenced observations 100  
have not been considered in any phylodynamic inference method. Below we describe the 101  
sampling model formally and the method used to approximation of its likelihood, 102  
TimTam. An implementation of this method is available from 103

(<https://github.com/aezarebski/timtam>). 104

## Phylogenetic Birth-Death Process 105

The birth-death (BD) process starts with a single infectious individual at the time of 106  
origin,  $t = 0$ . Infectious individuals “give birth” to new infectious individuals at rate  $\lambda$ , 107  
and are removed from the process either through naturally ceasing to be infectious (at 108  
rate  $\mu$ , often called the “death” rate), or through being sampled. Unscheduled sampling 109  
of infectious individuals occurs at different rates depending on whether the samples are 110  
sequenced (which occurs at rate  $\psi$ ) or not (which occurs at rate  $\omega$ ). An illustrative 111  
example of this process is shown in Panel A of Fig 1. Individuals can also be removed in 112  
scheduled sampling events. Scheduled sampling occurs at predetermined times, during 113  
which each infectious individual is independently sampled with a fixed probability: for a 114  
sequenced sample each lineage is sampled with probability  $\rho$  and for an unsequenced 115  
sample each lineage is sampled with probability  $\nu$ . An illustrative example of the 116  
process with both scheduled and unscheduled sampling is shown in Fig S1. We denote 117  
scheduled sampling times  $r_i$  for sequenced sampling and  $u_i$  for unsequenced sampling, 118  
and assume these times are known a priori, since they are under the control of those 119  
observing the system. 120

Realisations of the process are binary trees with internal nodes corresponding to 121  
infection events and terminal nodes representing removal events as shown in Fig 1 and 122  
S1. We assume the edges of the tree are labelled with their length to ensure the nodes 123  
appear at the correct depth. The tree containing all infected individuals is the 124  
*transmission tree* (Fig 1A, and S1B). The subtree containing only the terminal nodes 125  
corresponding to sequenced samples (both scheduled and unscheduled) is called the 126  
*reconstructed tree* [39], (Fig 1C, and S1C). In practice, the topology and branch lengths 127  
of the reconstructed tree are estimated from the pathogen genomes; here we assume 128  
these are known a priori. 129

Trees can be summarised by their *lineages through time* (LTT) plot, which describes 130  
the number of lineages in the tree at each point in time. We denote the number of 131  
lineages in the reconstructed tree at time  $t_i$  by  $K_i$  (Fig 1B). We define the number of 132  
*hidden* lineages through time as the number of lineages that appear in the transmission 133

tree but not in the reconstructed tree. The number of hidden lineages at time  $t$  is denoted  $H(t)$ , and for convenience as  $H_i$  at time  $t_i$ . The types of data that we consider can be thought of as a sequence of  $N$  events,  $\mathcal{E}_{1:N}$ , starting from the origin and moving forward in time up to the present (ie the time of the last observation):

$\mathcal{E}_{1:N} = \{(\Delta t_i, e_i, \Delta K_i, \Delta H_i)\}_{i=1\dots N}$  with  $\Delta t_i$  denoting the time since the previous observation (ie  $\Delta t_i := t_i - t_{i-1}$ ) and  $e_i$  describing the event that was observed at that time:  $e_i \in \{\lambda\text{-event}, \psi\text{-event}, \rho\text{-event}, \omega\text{-event}, \nu\text{-event}\}$ . The changes in the LTT and number of hidden lineages at time  $t_i$  are denoted  $\Delta K_i$ , so  $K_i = K_{i-1} - \Delta K_i$ , and  $\Delta H_i$ , so  $H(t_i) = H(t_i^-) - \Delta H_i$ .

There are two important assumptions in the description above. The first is that once and individual has been sampled they are removed from the infectious population. This is a standard, though not universal, assumption and often justified by the fact that sampling broadly coincides with receiving medical care, and hence taking care not to spread the infection further. The second is that if there is a scheduled sample, it contains either all sequenced samples or all unsequenced samples, ie there are no scheduled samples with both sequenced and unsequenced observations.

## The Likelihood

The joint conditional distribution of the process parameters,  $\theta = (\lambda, \mu, \psi, \rho, \omega, \nu)$ , and the number of hidden lineages at time  $t_N$ ,  $H(t_N)$ , factorises as follows:

$$f(\theta, H_N | \mathcal{E}_{1:N}) \propto f(H_N | \mathcal{E}_{1:N}, \theta) \underbrace{f(\mathcal{E}_{1:N} | \theta)}_{\text{Likelihood}} \underbrace{\pi(\theta)}_{\text{Prior}},$$

where  $f(H_N | \mathcal{E}_{1:N}, \theta)$  is the posterior distribution of the prevalence given  $\theta$  which can be used to obtain the posterior predictive distribution of the prevalence:  $f(H_N | \mathcal{E}_{1:N})$ . The likelihood has a natural factorisation which corresponds to processing the data from the origin through to the present:

$$f(\mathcal{E}_{1:N} | \theta) = \prod_{i=1}^N f(\mathcal{E}_i | \mathcal{E}_{1:(i-1)}, \theta) = \prod_{i=1}^N c_i l_i. \quad (1)$$

Since the likelihood of each observation depends on the distribution of the number of hidden lineages, the distribution of  $\mathcal{E}_i$  depends on the whole history  $\mathcal{E}_{1:(i-1)}$ . Each

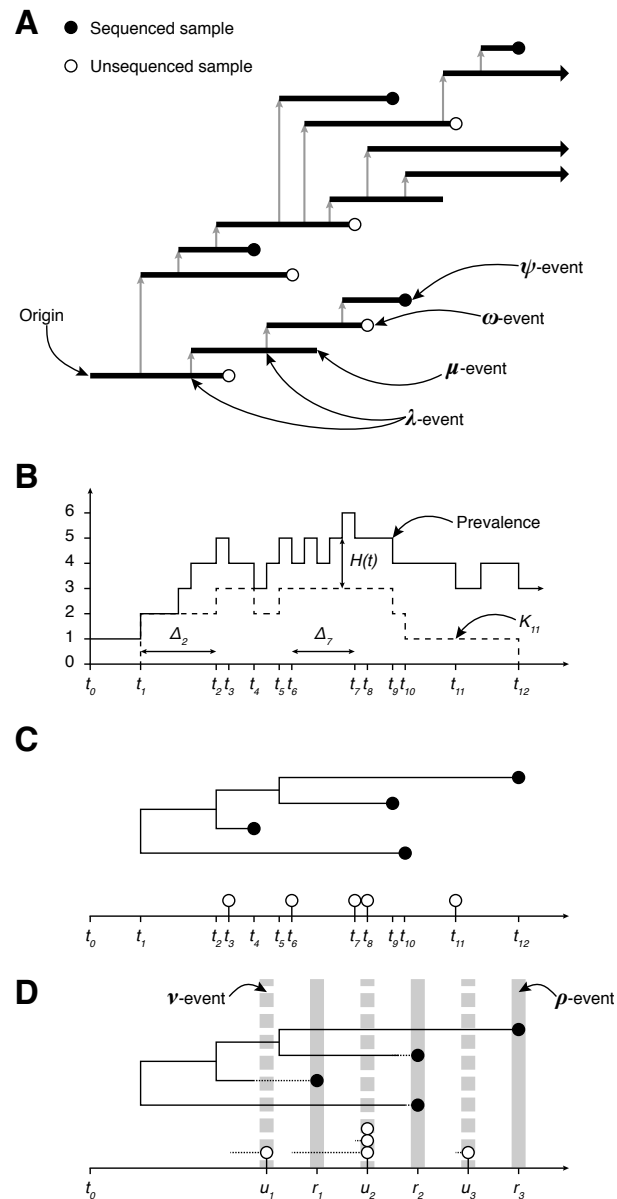

**Fig 1. Birth-death model of transmission and observation.** The process can be observed in several ways leading to different data types. **(A)** The transmission process produces a binary tree (the transmission tree) where an infection corresponds to a  $\lambda$ -event and a branch node and ceasing to be infectious corresponds to a  $\mu$ -,  $\psi$ - or  $\omega$ -event and a leaf node. **(B)** The number of lineages in the transmission tree through time, ie the prevalence of infection, and the number of lineages in the reconstructed tree, known as the lineages through time (LTT) plot,  $K$ . **(C)** The tree reconstructed from the sequenced samples:  $\psi$ -events. The pathogen sequences allow the phylogeny connecting the infections and the timing of  $\lambda$ -events to be inferred. The unsequenced,  $\omega$ -events form the point process on the horizontal axis. **(D)** Multiple  $\psi$ -events can be aggregated into a single  $\rho$ -event, such as the one at time  $r_2$ . This loses information due to the discretization of the observation time, indicated by the dashed line segment. The same approach is used to aggregate  $\omega$ -events into a single  $\nu$ -event, eg the observation made at time  $u_2$ .



factor,  $f(\mathcal{E}_i | \mathcal{E}_{1:(i-1)}, \theta)$ , can be expressed as a product,  $c_i l_i$ , where  $c_i$  is the probability  
 that no events were observed during the interval of time,  $(t_{i-1}, t_i)$ , and  $l_i$  is the  
 probability that the event observed at the end of the interval is  $e_i$ .

Let  $M(t, z)$  be the generating function (GF) for the distribution of  $H(t)$  and the  
 observations up until time  $t$ ,

$$M(t, z) := \sum_h \mathbb{P}(H(t) = h, \mathcal{E}_{1:x} : t_x \leq t) z^h.$$

The likelihood is evaluated by traversing the data from the start of the process through  
 to the present, calculating the distribution of hidden lineages and the  $c_i$  and  $l_i$  along the  
 way.

Consider a sequence of functions,  $M_i(t, z)$ , which correspond to  $M(t, z)$  over the  
 intervals  $(t_i, t_{i+1})$ , up to a normalisation constant which ensures  $M_i(t_i, 1) = 1$ . We  
 define the  $M_i$  with a system of partial differential equations (PDEs) derived using the  
 Master equations for the number of hidden lineages changes through time.

$$\begin{aligned} M_i(t_i, z) &= F_i(z) \\ \partial_t M_i &= (\lambda z^2 - \gamma z + \mu) \partial_z M_i + K_i (2\lambda z - \gamma) M_i, \end{aligned} \tag{2}$$

where  $\gamma = \lambda + \mu + \psi + \omega$  and  $\partial_x$  is used to indicate partial differentiation with respect  
 to the variable  $x$ . The number of lineages in the reconstructed tree,  $K_i$ , only changes  
 when there is a birth, or a sequenced sample and so is a constant over each interval.

The process starts with a single infected individual, so initially there are no hidden  
 lineages and consequently the initial condition on the first interval is  $M_0(0, z) = 1$ .  
 Subsequent boundary conditions,  $F_i(z)$ , are based on the solution over the previous  
 interval,  $M_{i-1}$  and the event that was observed at time  $t_i$ .

The solution to Eq (2), first given as **Proposition 4.1** in [49], is

$$M_i(t, z) = F_i(p_0(t_{i+1} - t, z)) \left( \frac{p_1(t_{i+1} - t, z)}{1 - z} \right)^{K_i}. \tag{3}$$

The functions  $p_0$  and  $p_1$  are standard results describing the probability of an individual  
 and their descendants giving rise to exactly zero or one observation over a duration of

length  $t_{i+1} - t$ ; see [48] and the additional comments in the Appendix for further details. 181

Using Eq (3) the probability of not observing anything between times  $t_i$  and  $t_{i+1}$ , 182  
and the probability generating function for the number of hidden lineages just prior to 183  
the observation at  $t_{i+1}$  are 184

$$c_{i+1} = M_i(t_{i+1}, 1) \quad \text{and} \quad \mathcal{M}_i(z) := M_i(t_{i+1}, z)/c_{i+1}. \quad (4)$$

The process of calculating  $l_{i+1}$ , the likelihood of observing  $\mathcal{E}_{i+1}$ , and the next 185  
boundary condition,  $F_{i+1}(z)$ , the PGF of the number of hidden lineages at  $t_{i+1}$  is 186  
carried out in two steps. First, we transform  $\mathcal{M}_i$  to account for the observation of  $\mathcal{E}_{i+1}$  187  
and evaluate the resulting expression at  $z = 1$  to obtain  $l_{i+1}$  (using the transformations 188  
described below in Eq (5), (6), (7) and (8)). Second, we normalise the coefficients of 189  
this GF to get the PGF of  $H(t_{i+1})$ , which is the boundary condition,  $F_{i+1}(z)$ , in the 190  
PDE for  $M_{i+1}$  in Eq (2). This process is repeated for each interval of time to get all the 191  
 $c_i$  and  $l_i$  in Eq (1). 192

We will now describe the transformations to  $\mathcal{M}_i$  used to account for the observation 193  
of  $\mathcal{E}_{i+1}$ . Since  $\lambda$ - and  $\psi$ -events are only observed upon the reconstructed tree and do not 194  
influence the number of hidden lineages,  $\mathcal{M}_i$  is left unchanged when these are observed, 195

$$l_{i+1} = \begin{cases} \lambda & \mathcal{E}_{i+1} \text{ is a } \lambda\text{-event} \\ \psi & \mathcal{E}_{i+1} \text{ is a } \psi\text{-event} \end{cases} \quad (5)$$

$$F_{i+1}(z) = \mathcal{M}_i(z).$$

For an  $\omega$ -event we need to shift the whole distribution of  $H$  and account for the 196  
unknown number of hidden lineages that could have been sampled, this is achieved by 197  
taking the partial derivative of the GF, which we denote by  $\partial_z$ , as elaborated upon in 198  
the Appendix. The likelihood of an  $\omega$ -event is the normalising constant after the 199  
differentiation: 200

$$l_{i+1} = \omega \partial_z \mathcal{M}_i(z)|_{z=1}, \quad (6)$$

$$F_{i+1}(z) = \frac{\omega}{l_{i+1}} \partial_z \mathcal{M}_i(z).$$

For a scheduled sampling event, at time  $r_{i+1}$  with removal probability  $\rho$ , we need to 201

account for the survival of each of the  $H$ -lineages that were not sampled, those that  
 were, and the number of lineages in the reconstructed tree that were not removed during  
 this scheduled sampling. This leads to the following likelihood factor and updated PGF:

$$\begin{aligned}
 l_{i+1} &= \frac{(1-\rho)^{K_{i+1}} \rho^{\Delta K_{i+1}}}{(\Delta K_{i+1})!} \mathcal{M}_i(1-\rho), \\
 F_{i+1}(z) &= \frac{(1-\rho)^{K_{i+1}} \rho^{\Delta K_{i+1}}}{(\Delta K_{i+1})! l_{i+1}} \mathcal{M}_i((1-\rho)z).
 \end{aligned}
 \tag{7}$$

The factor of  $1-\rho$  in the argument of  $\mathcal{M}_i$  is to account for the  $H$ -lineages that were  
 not sampled. The factors of  $(1-\rho)^{K_{i+1}}$  and  $\rho^{\Delta K_{i+1}}$  come from the lineages in the  
 reconstructed tree that were not sampled (of which there are  $K_{i+1}$ ), and those that  
 were sampled (of which there are  $\Delta K_{i+1}$ ).

Last, we include scheduled unsequenced samples, ie the observation and  
 simultaneous removal of multiple lineages without subsequent inclusion in the  
 reconstructed phylogeny. For Equations (6), we noted that a single  $\omega$ -sampling event  
 corresponds to differentiating the PGF of  $H$  once. If at time  $t_{i+1}$  there is a scheduled  
 unsequenced sample where each infectious individual is sampled with probability  $\nu$ , and  
 $n$  lineages in total are sampled, then we must take the  $n$ -th derivative and accumulate a  
 likelihood factor for the removed and non-removed lineages of  $(1-\nu)^K \nu^n$  (assuming the  
 LTT at that time is  $K$ ). We also have to scale  $z$  by a factor of  $1-\nu$  to account for the  
 $H$ -lineages that were not sampled. Therefore, as in Equations (6) and (7), the  
 likelihood and updated PGF after a  $\nu$ -sample are:

$$\begin{aligned}
 l_{i+1} &= \frac{(1-\nu)^{K_{i+1}} \nu^{\Delta H_{i+1}}}{(\Delta H_{i+1})!} \partial_{\hat{z}}^{\Delta H_{i+1}} \mathcal{M}_i(\hat{z})|_{\hat{z}=(1-\nu)} \\
 F_{i+1}(z) &= \frac{(1-\nu)^{K_{i+1}} \nu^{\Delta H_{i+1}}}{(\Delta H_{i+1})! l_{i+1}} \partial_{\hat{z}}^{\Delta H_{i+1}} \mathcal{M}_i(\hat{z})|_{\hat{z}=(1-\nu)z},
 \end{aligned}
 \tag{8}$$

where the use of  $\hat{z}$  has been used to make explicit the order of operations.

Evaluating the expressions above numerically typically requires truncating a system  
 of ordinary differential equations (ODEs) and solving them on each interval. This  
 operation has a complexity which is cubic in the size of the truncated system (as a  
 matrix exponential is required). [49] derives an approximation which has a quadratic  
 complexity, albeit by introducing a further approximation. Our TimTam approximation,  
 the main contribution of this paper, is as accurate as existing methods and has only a

linear complexity. 226

## An Analytic Approximation 227

Our analytic approximation, TimTam, can be described as simply replacing the PGF of 228  
 $H$  with a more convenient PGF which describes a random variable with the same mean 229  
and variance. Specifically, we use the negative binomial (NB) distribution. We note two 230  
facts: first, we can evaluate the full PGF point-wise described above and, second, as 231  
shown in the Appendix, the GF of the negative binomial (NB) distribution is closed (up 232  
to a simple multiplicative factor) under partial derivatives and scaling of the parameter 233  
 $z$ . Together, these mean we can construct a NB approximation of the PGF at any point 234  
in the process and hence evaluate the resulting approximate likelihood and the 235  
distribution of hidden lineages. Algorithmically, this method can be expressed in the 236  
following steps: 237

1. Start at time  $t_i$  with the PGF  $M_i$  and use Equation (3) to obtain  $M_i$  at time  $t_{i+1}$ . 238
2. Calculate  $c_i = M_i(t_{i+1}, 1^-)$ , the probability of not observing any events during 239  
the interval  $(t_i, t_{i+1})$ . 240
3. Define the PGF  $\mathcal{M}_i = M_i/c_i$  and the PGF resulting from approximating it with a 241  
NB distribution:  $\widetilde{\mathcal{M}}_i$ . 242
4. Use  $\widetilde{\mathcal{M}}_i$  to compute,  $l_i$ , the likelihood of observing  $\mathcal{E}_{i+1}$  and let  $M_{i+1}$  be the PGF 243  
of the number of  $H$ -lineages conditioning upon this observation (see Equations 244  
(6), (7) and (8).) 245
5. Increment the log-likelihood by  $\log(c_i l_i)$  and return to Step 1 with an 246  
incremented  $i$  if there are remaining observations. 247

The steps involved require only the evaluation of closed form expressions and the 248  
number of iterations is linear with the number of observed events. 249

Our use of a NB moment-matching approximation is not arbitrary. [50] observed 250  
that the number of lineages descending from a single lineage has a zero-inflated 251  
geometric distribution and the sum of independent and identically distributed geometric 252  
random variables follows a NB distribution. Our approach of treating the number of 253

lineages derived from  $n$  individuals as a NB random variable is somewhat motivated by  
combining these two properties. Further support for our approximation is obtained by  
considering an equivalent BD process, but with the modified total birth rate of  $\lambda n + a$   
where  $a$  is a small offset representing an immigration rate that leads to the removal of  
the extra (unobservable) zeros. Such processes can be described by NB lineage  
distributions at all times of their evolution and are stable to the inclusion of additional  
event types. [19,24].

## Origin time vs TMRCA

The definition of the likelihood above assumes the origin of the phylogeny,  $t_0$  in Fig 1, is  
known or is a parameter to be estimated. This follows as we require the initial condition  
 $M_0(0, z) = 1$ . In practice the phylogeny will likely only be known up to the time of the  
most recent common ancestor (TMRCA),  $t_1$  in Fig 1. We might account for this in one  
of two ways. The first, and simplest, is to treat the origin time as an additional  
parameter to be estimated. The second is to set a boundary condition at the TMRCA  
and to estimate the distribution of hidden lineages at that point,  $H_1$ .

If one were confident the outbreak had stemmed from a single initial case, then the  
former method would be more suitable, especially if there was prior knowledge to  
constrain the time of origin. On the other hand, if we faced substantial uncertainty  
about how the outbreak began and sequencing was sparse, ie small  $\psi$  and  $\rho$ , then the  
TMRCA may be considerably more recent than the origin time and estimating the  
origin would be challenging. In this case, the latter approach may be more suitable.  
This would involve estimating the distribution of  $H_{\text{TMRCA}}$  and hence its GF  
 $M_1(t_{\text{TMRCA}}, z)$ , from the family of NB distributions.

## Results

### Model validation and computational complexity

We performed a simulation study to compare TimTam with the method from [49],  
hereafter called the ODE approximation. The parameters used to generate a stratified  
set of simulations are given in Table 1. The S1 Appendix provides a full description of

the simulation and subsampling process used to generate these test data. Fig 2 shows the value of the log-likelihood function evaluated using each method. Both methods produce very similar log-likelihood values, with TimTam explaining 98% of the variation in the ODE approximation values under a linear model.

**Table 1. Parameters used for all simulated datasets.**

| Parameter | Description                              | Value          |
|-----------|------------------------------------------|----------------|
| $\lambda$ | Birth rate                               | 1.7            |
| $\mu$     | Death rate                               | 0.9            |
| $\psi$    | Sequenced sampling rate                  | 0.05           |
| $\omega$  | Unsequenced sampling rate                | 0.25           |
| $\rho$    | Scheduled sequenced sampling probability | 0.5 at $t = 6$ |

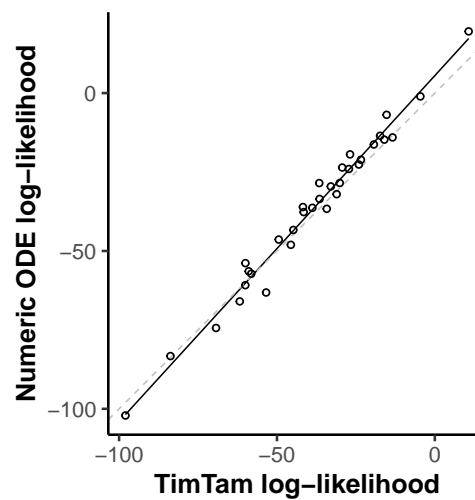

**Fig 2. Likelihood comparison.** Our TimTam approximation of the likelihood is in good agreement with the existing ODE approximation [49]. Each point shows the values of the log-likelihood computed using our approximation and the ODE approximation. The solid line shows a least squares fit which has an  $R^2$  of 0.98, the grey dashed line indicates parity,  $y = x$ .

To explore the computational complexity of TimTam, we measured how long it took to evaluate the log-likelihood for each of the simulated datasets. Fig 3 shows that with TimTam, the mean evaluation time grows approximately linearly with the size of the dataset,  $\propto n^{1.03}$ , where the 95% confidence interval (CI) on the exponent is (1.02, 1.04). In contrast, for the ODE approximation, the evaluation time grows approximately quadratically,  $\propto n^{2.38}$ , (95% CI = 2.26, 2.50). Since the ODE approximation requires specification of a truncation parameter, we obtained values for this parameter by increasing its value until doing so further resulted in a change to the log-likelihood of  $< 0.1\%$ . The resulting truncation parameters are shown in Fig S2 in S1 Appendix. Full

details of how the data were simulated, how the benchmarks were evaluated, and how the truncation parameter was selected are given in the Supplementary Materials.

In addition to the improvement in computational complexity, average evaluation times are orders of magnitude smaller for TimTam, which takes less than a millisecond in comparison to several seconds for the ODE approximation for larger datasets. However, we caution against over-interpreting the absolute computation times, since we used Haskell to implement TimTam, whereas the implementation of the ODE approximation, the same implementation used by [49], is a combination of C and Python. The faster computation time may depend on the programming language used as well as the algorithm. Nonetheless, the computational complexities of the respective algorithms means that the TimTam approach will outperform the ODE approximation for large datasets, regardless of the implementation.

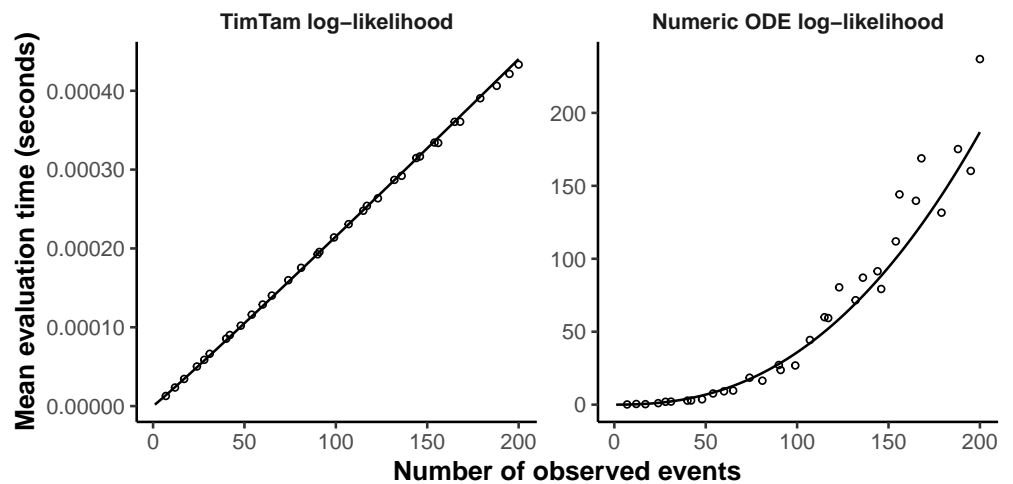

**Fig 3. Log-likelihood evaluation time comparison.** The time required to evaluate our approximation, TimTam, scales better with the dataset size than the existing ODE approximation. The scatter plots indicates the average number of seconds required to evaluate the log-likelihood function for each dataset size. The left panel contains the results using our approximation, which has times growing approximately linearly with the dataset size. The right panel contains the results using the ODE approximation, which has times growing approximately quadratically with the dataset size. Solid lines show least squares fits. Note that the  $y$ -axes are on different scales. The overall scaling factor (but not the exponent of the fitted model) may be implementation dependent.

## Parameter identifiability and aggregation scheme

Having validated TimTam against the ODE approximation, we now showcase our approach as an estimation scheme that merges all the data types considered in this manuscript. We also explore the effect of aggregating unscheduled samples into scheduled sampling events, looking at the accuracy and bias of the estimates when we further obfuscate the data.

We first verified that, given a known death rate  $\mu$ , the model parameters are identifiable using a simulation that includes all four types of sampling events described above. Fig S3–S9 of S1 Appendix show cross sections of the likelihood surface and scatter plots of the posterior samples. We also show that the statistical power to estimate model parameters increases with simulation length (and hence the size of the dataset). Additional details of the simulation and estimation methods are given in S1 Appendix.

Next, we simulated a dataset using the rate parameters in Table 1 but with the scheduled sampling probability set to zero, ie a simulation which only contains unscheduled samples. The simulation was started with a single infectious individual and stopped at  $t = 13.5$ . From the unscheduled observations a second dataset was derived, this was done by aggregating the unscheduled observations into scheduled observations, eg all the unscheduled sequences sampled during the interval  $(t_a, t_b]$  were combined into a single scheduled sequenced sample at time  $t_b$  (as illustrated in Fig 1D). This aggregation reflects how cases may only be reported at particular temporal resolutions, eg daily or weekly case counts.

The sequenced samples were aggregated into observations at  $t = 2.5, 3.5, \dots, 13.5$  and unsequenced samples were aggregated at  $t = 2.4, 3.4, \dots, 13.4$ . In simulating these data, only simulations that did not go extinct during the simulation period and had 1000–10000 events were used (as a way to avoid excessive run times and ensure that there was a sufficient amount of transmission). Moreover, any simulations where the simulated population decreased to only a single individual at any time after the first infection were discarded, as this could result in the reconstructed tree having a significantly younger TMRCA than the transmission tree.

Fig 4A and B shows the sequenced and unsequenced samples in the simulated



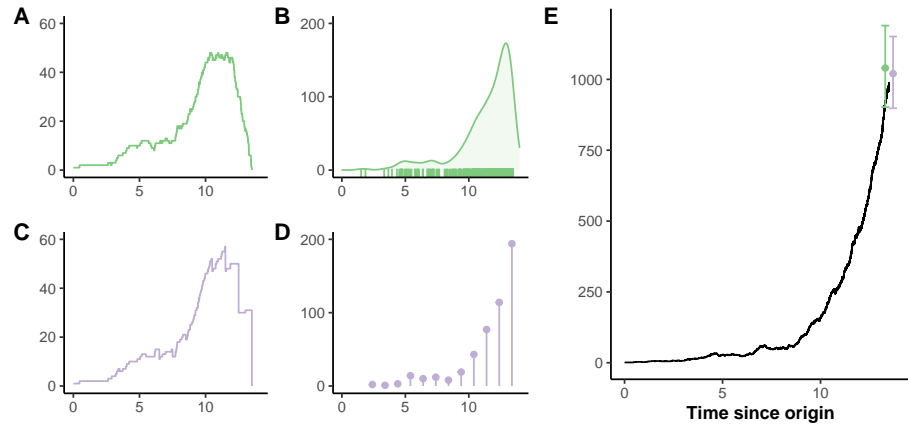

**Fig 4. Data aggregation example.** The effect of aggregation on the dataset and estimates of prevalence. **(A)** The LTT of the tree reconstructed from the unscheduled sequenced observations. **(B)** The density of unscheduled unsequenced observations, ie a point process of observations. **(C)** The LTT of the tree reconstructed from the sequenced observations after aggregation into scheduled sampling events. **(D)** The number of unsequenced observations aggregated into regular scheduled observations, ie a time series of cases reported at regular intervals. **(E)** The total prevalence of infection throughout the simulation is represented by the black line, the points and error bars indicate estimates (and 95% credible intervals) of the prevalence at the present, colour coded by the dataset used (green, unscheduled data; lilac, aggregated data). Fig 5 shows the marginal posterior distributions using each dataset.

dataset. Fig 4C and D shows the same dataset after aggregation. Fig 4E shows the 338  
prevalence through time in the simulation and the corresponding estimates at  $t = 13.5$  339  
using the simulated and aggregated datasets, respectively. Fig 5 shows the marginal 340  
posterior distributions of  $\lambda$ , and either  $\psi$  and  $\omega$ , or  $\rho$  and  $\nu$  depending on the dataset 341  
used. 342

When estimating model parameters the death rate  $\mu$  was fixed to the true value used 343  
while simulating the data, since not fixing one of the parameters makes the likelihood 344  
unidentifiable and estimates of  $\mu$  may be obtained from additional data sources [4, 29]. 345  
The posterior samples were generated via MCMC. Standard diagnostics were used to 346  
test the convergence and mixing of the MCMC, (further details of the MCMC 347  
diagnostics and visualisations of the joint distribution of the posterior samples are given 348  
in S1 Appendix.) 349

While prevalence estimates from both the original unscheduled and aggregated 350  
datasets are overlapping and contain the truth, aggregation leads to underestimating 351  
the birth rate. This bias is likely due to the aggregation scheme used (see S1 Appendix 352

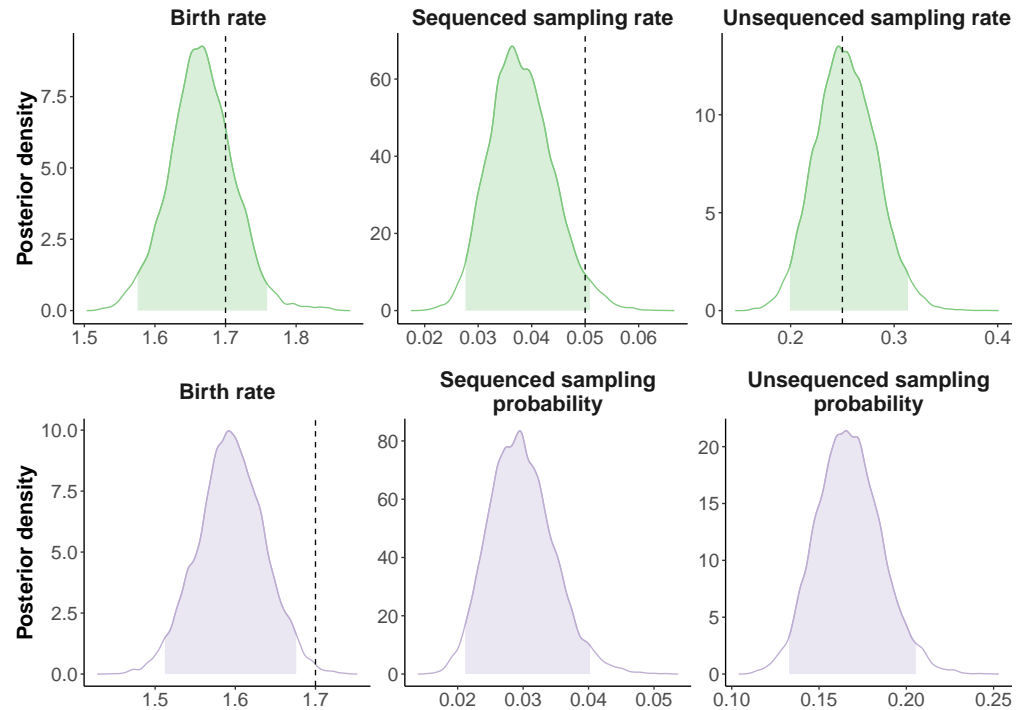

**Fig 5. Posterior distributions.** Given the death rate,  $\mu$ , the posterior distributions for both datasets shown in Fig 4 have well-defined maxima. The charts show the marginal posterior distributions of parameters using either the unscheduled samples (top row, green) or the scheduled samples post aggregation (bottom row, lilac). Filled areas indicate 95% credible intervals. Vertical dashed lines indicate true parameter values where they exist (Table 1). There are no vertical lines for the scheduled observation probabilities because they are not well defined for this simulation.

for further commentary). Moreover, the sequenced sampling rate is underestimated 353  
when using the unscheduled dataset. We conjecture that this is due to there being 354  
roughly five times fewer sequenced than unsequenced samples. Although the true values 355  
for the sampling probabilities estimated from the aggregated dataset are not known, the 356  
ratio between the two parameters is similar to the ratio between the unscheduled 357  
sampling rates. 358

### Repeated simulation to test credible interval coverage 359

Fig 6 (top panel) shows the 95% credible interval (CI) and point estimate (posterior 360  
median) of the basic reproduction number,  $\mathcal{R}_0 = \lambda/(\mu + \psi + \omega)$ , for each of 100 361  
simulation replicates. The simulation parameters used are the same as those used to 362  
simulate the data shown in Fig 4. The estimates are sorted according to the estimated 363

$\mathcal{R}_0$  value. Of the 100 replicates, 87 have a CI containing the true  $\mathcal{R}_0$ . The Appendix  
contains some commentary on the level of coverage that is expected.

Fig 6 (bottom panel) shows the 95% CI and point estimate (posterior median) of the  
relative bias in the estimate of the prevalence in each replicate (ie the proportion by  
which the estimate differs from the true prevalence in that particular replicate; for an  
estimate  $\hat{\theta}$  of  $\theta$ , this is  $(\hat{\theta} - \theta)/\theta$ ). The relative bias is used rather than the bias because  
the true prevalence varies substantially across replicates making it difficult to compare  
them. In this figure the replicates in the top and bottom panels are in the same order.  
Of the 100 replicates, 64 have a CI containing the true prevalence at the end of the  
simulation (and hence cross 0).

Analogous estimates were performed for the aggregated data (generated using the  
process described above). It appears that the aggregation introduces a systematic bias  
towards underestimation of the birth rate. The estimates of the prevalence at the  
present are similarly unbiased for the aggregated data, although the CI coverage is  
lower. Full results are presented in S1 Appendix.

## Discussion

We have described an analytic approximation, called TimTam, for the likelihood of a  
birth-death-sampling model which can also describe *scheduled data* ie cohort sampling  
or reporting at predetermined times. TimTam can analyse both sequenced and  
unsequenced samples, ie the observations can represent sequences that are either  
included in the reconstructed tree, or observed infections that are not sequenced  
(occurrence data). Our approach generalises previous birth-death estimation  
frameworks [47, 49, 51] by accommodating and exploiting more data types than  
previously considered and makes it feasible to analyse very large datasets.

Our work is a step towards more flexible time series-based approaches to  
phylodynamics, in which multiple sequences are processed concurrently as elements of a  
time series. This extends the more common point-process based paradigm, in which  
samples are considered individually. TimTam also provides an estimate of the  
distribution of the prevalence of infection, allowing both the estimation of summary  
statistics, such as  $\mathcal{R}_0$ , and the total number of cases. Comparison with existing

algorithms on small-to-moderate sized datasets suggests it faithfully represents the true  
likelihood function.

At present, we cannot provide rigorous bounds on the error introduced by this  
approximation (although work is underway on this). Based on our simulation study, the  
credible intervals under this likelihood (with an improper uniform prior) slightly  
underestimate the level of uncertainty in the estimates of the basic reproduction number  
and the prevalence of infection. Although, as discussed, this is not surprising given  
these are credible intervals rather than confidence intervals.

Based on work from [50], we conjecture that if the probability of extinction becomes  
large, the zero inflation in the geometric distributions describing the number of  
descending lineages might become an issue. Since our focus is on large datasets  
describing established epidemics, we expect that this situation will rarely arise in  
practice. Additionally, as the death rate increases, the power of birth-death models as  
an inference tool is naturally limited by a lack of data [35,36]. If this method is applied  
to small outbreaks or, when the reproduction number is low, sensitivity analyses will be  
necessary to check the fidelity of the negative binomial approximation.

Our work echoes the frameworks of [51] and [49], but trades some generality for  
simplicity and tractability. Specifically, [51] presented a particle filtering method that  
can be applied more generally, while [49] derived a complete posterior predictive  
distribution of prevalence over time, which allows the study of historical transmission.  
Another limitation of our approach, which is common to many models, is to neglect  
*sampled ancestors*, ie individuals who have been observed but remain in the infectious  
population [47,49,54]. While the former can describe a greater variety of birth-death  
processes and the latter can be used to estimate additional properties of the process, the  
scalability of both frameworks are limited by the computational burden.

Our approximation provides a computationally efficient method for handling diverse  
data types (such as data aggregated to a daily or weekly resolution) that is scalable to  
large datasets. We also introduce an aggregation scheme that radically reduces the  
computational burden with only a modest expense to the accuracy. The improvement in  
performance stems from the resulting likelihood computation scaling by the number of  
aggregated intervals, proportional to epidemic length, rather than the epidemic size. In  
many real epidemic scenarios data are only reported at a particular temporal resolution

and in such scenarios this aggregation reflects the best-case for inference. As the 426  
availability of phylogenetic data (derived from sequences or contact-tracing) increases 427  
and the size of these data grows, such approximation schemes will become increasingly 428  
valuable. 429

## Supporting information 430

**S1 Appendix. Additional details of the approximation scheme and 431  
computational methodology.** This document provides additional details regarding 432  
the derivation of the approximation scheme and provides additional detail on the 433  
simulation and benchmarking computations. 434

## Acknowledgements 435

The authors are grateful to Marc Manceau for his keen examination of an earlier draft 436  
of this manuscript and helpful comments. 437

AEZ, OGP and LdP are supported by The Oxford Martin Programme on Pandemic 438  
Genomics. KVP is funded under grant reference MR/R015600/1 by the UK Medical 439  
Research Council (MRC) and the UK Department for International Development 440  
(DFID) 441

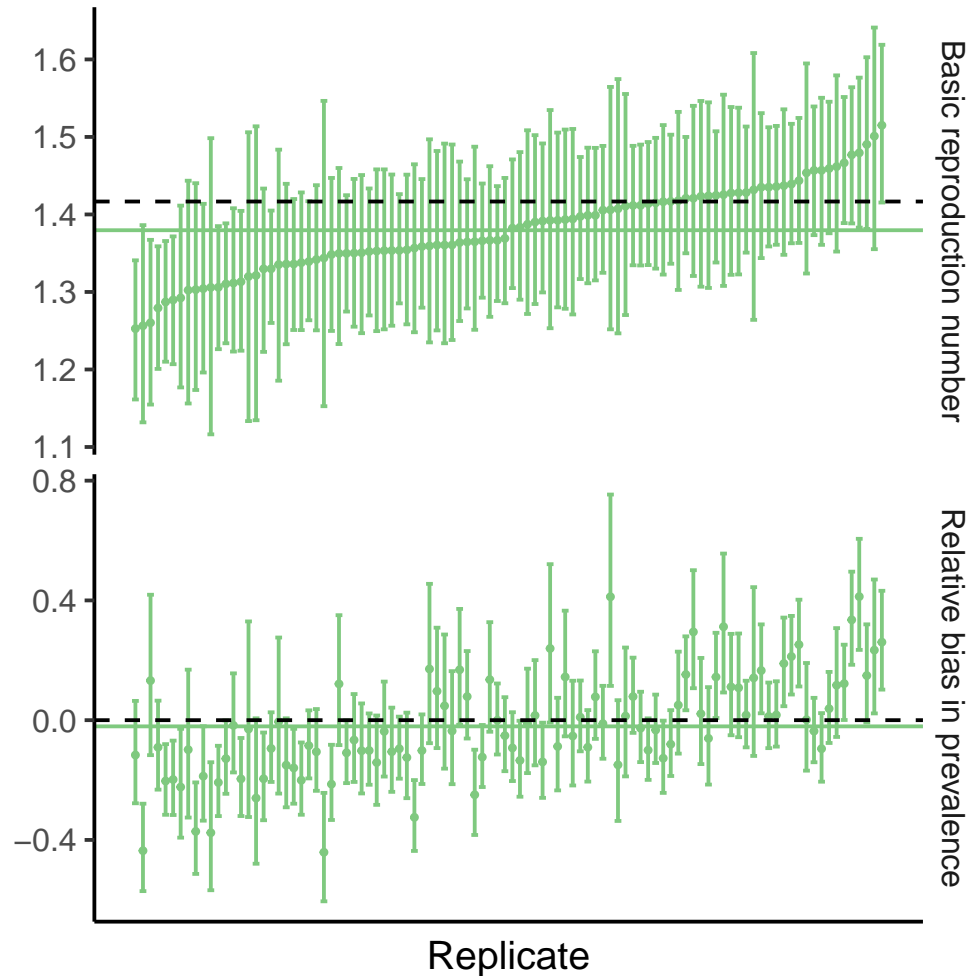

**Fig 6. Simulation study results.** The bias in the estimators of the basic reproduction number,  $\mathcal{R}_0$ , and the prevalence is small. The top panel shows the (ranked)  $\mathcal{R}_0$  point estimates and 95% CI for each replicate. For 87 of these the CI contains the value used in the simulation, 1.42, which is indicated by the horizontal dashed line. The bottom panel shows the relative error in the prevalence estimate (ie a value of zero corresponds to the true prevalence in that replicate.) The coverage (64 of 100) is lower than 95% which is not unusual given coverage properties do not hold in general for credible intervals. The corresponding intervals using the aggregated data are shown in Figures S8 and S9. The solid horizontal lines indicate the mean of the point estimates.

## References

1. Moler C, Van Loan C. Nineteen Dubious Ways to Compute the Exponential of a Matrix, Twenty-Five Years Later. *SIAM Review*. 2003;45(1):3–49.
2. du Plessis L, McCrone JT, Zarebski AE, Hill V, Ruis C, Gutierrez B, et al. Establishment and lineage dynamics of the SARS-CoV-2 epidemic in the UK. *Science*. 2021;371(6530):708–712. doi:10.1126/science.abf2946.
3. Lau MSY, Marion G, Streftaris G, Gibson G. A Systematic Bayesian Integration of Epidemiological and Genetic Data. *PLOS Computational Biology*. 2015;11(11):1–27. doi:10.1371/journal.pcbi.1004633.
4. Louca S, McLaughlin A, MacPherson A, Joy JB, Pennell MW. Fundamental identifiability limits in molecular epidemiology. *bioRxiv*. 2021;doi:10.1101/2021.01.18.427170.
5. Plummer M, Best N, Cowles K, Vines K. CODA: Convergence Diagnosis and Output Analysis for MCMC. *R News*. 2006;6(1):7–11.
6. Karcher MD, Carvalho LM, Suchard MA, Dudas G, Minin VN. Estimating effective population size changes from preferentially sampled genetic sequences. *PLOS Computational Biology*. 2020;16(10):1–22. doi:10.1371/journal.pcbi.1007774.
7. Pybus OG, Rambaut A. Evolutionary analysis of the dynamics of viral infectious disease. *Nature Reviews Genetics*. 2009;10(8):540–550. doi:10.1038/nrg2583.
8. Flajolet P, Sedgewick R. *Analytic Combinatorics*. Cambridge University Press; 2009.
9. Featherstone LA, Di Giallonardo F, Holmes EC, Vaughan TG, Duchêne S. Infectious disease phylodynamics with occurrence data. *bioRxiv*. 2020;doi:10.1101/596700.
10. Harremoës P, Johnson O, Kontoyiannis I. Thinning and the law of small numbers. In: 2007 IEEE International Symposium on Information Theory. IEEE; 2007. p. 1491–1495.

11. MacPherson A, Louca S, McLaughlin A, Joy JB, Pennell MW. A General Birth-Death-Sampling Model for Epidemiology and Macroevolution. *bioRxiv*. 2020;doi:10.1101/2020.10.10.334383.
12. Wallinga J, Teunis P. Different Epidemic Curves for Severe Acute Respiratory Syndrome Reveal Similar Impacts of Control Measures. *American Journal of Epidemiology*. 2004;160(6):509–516. doi:10.1093/aje/kwh255.
13. Mercer GN, Glass K, Becker NG. Effective reproduction numbers are commonly overestimated early in a disease outbreak. *Statistics in Medicine*. 2011;30(9):984–994. doi:10.1002/sim.4174.
14. Gill MS, Lemey P, Bennett SN, Biek R, Suchard MA. Understanding Past Population Dynamics: Bayesian Coalescent-Based Modeling with Covariates. *Systematic Biology*. 2016;65(6):1041–1056. doi:10.1093/sysbio/syw050.
15. Stadler T. How Can We Improve Accuracy of Macroevolutionary Rate Estimates? *Systematic Biology*. 2012;62(2):321–329. doi:10.1093/sysbio/sys073.
16. Volz EM, Kosakovsky Pond SL, Ward MJ, Leigh Brown AJ, Frost SDW. Phylodynamics of Infectious Disease Epidemics. *Genetics*. 2009;183(4):1421–1430. doi:10.1534/genetics.109.106021.
17. Pybus OG, Charleston MA, Gupta S, Rambaut A, Holmes EC, Harvey PH. The Epidemic Behavior of the Hepatitis C Virus. *Science*. 2001;292(5525):2323–2325. doi:10.1126/science.1058321.
18. Tang M, Dudas G, Bedford T, Minin VN. Fitting stochastic epidemic models to gene genealogies using linear noise approximation. *arXiv*. 2019;.
19. Ycart B. A Characteristic Property of Linear Growth Birth and Death Processes. *Sankhyā: The Indian Journal of Statistics, Series A (1961-2002)*. 1988;50(2):184–189.
20. Li LM, Grassly NC, Fraser C. Quantifying Transmission Heterogeneity Using Both Pathogen Phylogenies and Incidence Time Series. *Molecular Biology and Evolution*. 2017;34(11):2982–2995. doi:10.1093/molbev/msx195.



21. Brauer F, van den Driessche P, Wu J. *Mathematical Epidemiology*. Springer, Berlin, Heidelberg; 2008.
22. Moss R, Zarebski AE, Carlson SJ, McCaw JM. Accounting for Healthcare-Seeking Behaviours and Testing Practices in Real-Time Influenza Forecasts. *Tropical Medicine and Infectious Disease*. 2019;4(1). doi:10.3390/tropicalmed4010012.
23. Angelis DD, Presanis AM, Birrell PJ, Tomba GS, House T. Four key challenges in infectious disease modelling using data from multiple sources. *Epidemics*. 2015;10:83 – 87. doi:<https://doi.org/10.1016/j.epidem.2014.09.004>.
24. Kapodistria S, Phung-Duc T, Resing J. Linear Birth/Immigration-Death Process with Binomial Catastrophes. *Probability in the Engineering and Informational Sciences*. 2016;30(1):79–111.
25. Kühnert D, Stadler T, Vaughan TG, Drummond AJ. Simultaneous reconstruction of evolutionary history and epidemiological dynamics from viral sequences with the birth-death SIR model. *Journal of The Royal Society Interface*. 2014;11(94):20131106. doi:10.1098/rsif.2013.1106.
26. Kingman JFC. On the Genealogy of Large Populations. *Journal of Applied Probability*. 1982;19:27–43.
27. Parag KV, du Plessis L, Pybus OG. Jointly Inferring the Dynamics of Population Size and Sampling Intensity from Molecular Sequences. *Molecular Biology and Evolution*. 2020;37(8):2414–2429. doi:10.1093/molbev/msaa016.
28. Parag KV, Pybus OG. Exact Bayesian inference for phylogenetic birth-death models. *Bioinformatics*. 2018;34(21):3638–3645. doi:10.1093/bioinformatics/bty337.
29. Stadler T, Kühnert D, Bonhoeffer S, Drummond AJ. Birth-death skyline plot reveals temporal changes of epidemic spread in HIV and hepatitis C virus (HCV). *Proceedings of the National Academy of Sciences*. 2013;110(1):228–233. doi:10.1073/pnas.1207965110.

30. Stadler T, Kouyos R, von Wyl V, Yerly S, Böni J, Bürgisser P, et al. Estimating the Basic Reproductive Number from Viral Sequence Data. *Molecular Biology and Evolution*. 2011;29(1):347–357. doi:10.1093/molbev/msr217.
31. Hohna S. Fast Simulation of Reconstructed Phylogenies under Global Time-Dependent Birth–Death Processes. *Bioinformatics*. 2013;29(11):1367–74.
32. Stadler T, Vaughan T, Gavryushkin A, et al. How well can the Exponential-Growth Coalescent Approximate Constant-Rate Birth-Death Population Dynamics? *Proc R Soc B*. 2015;282.
33. Rasmussen DA, Ratmann O, Koelle K. Inference for Nonlinear Epidemiological Models Using Genealogies and Time Series. *PLOS Computational Biology*. 2011;7(8):1–11. doi:10.1371/journal.pcbi.1002136.
34. Hohna S, Stadler T, Ronquist F, Britton T. Inferring Speciation and Extinction Rates under Different Sampling Schemes. *Mol Biol Evol*. 2011;28(9):2577–89.
35. Kubo T, Iwasa Y. Inferring the Rates of Branching and Extinction from Molecular Phylogenies. *Evolution*. 1995;49(4):694–704.
36. Pyron R, Burbink F. Phylogenetic Estimates of Speciation and Extinction Rates for Testing Ecological and Evolutionary Hypotheses. *Trends in Ecology and Evolution*. 2013;28(12):729–36.
37. Rasmussen DA, Boni MF, Koelle K. Reconciling Phylodynamics with Epidemiology: The Case of Dengue Virus in Southern Vietnam. *Molecular Biology and Evolution*. 2014;31(2):258–271.
38. Ypma R, van Ballegooijen W, Wallinga J. Relating Phylogenetic Trees to Transmission Trees of Infectious Disease Outbreaks. *Genetics*. 2013;195:1055–62.
39. Nee S, May RM, Harvey PH. The reconstructed evolutionary process. *Philosophical Transactions of the Royal Society of London Series B: Biological Sciences*. 1994;344(1309):305–311. doi:10.1098/rstb.1994.0068.
40. Hey J. Using Phylogenetic Trees to Study Speciation and Extinction. *Evolution*. 1992;46(3):627–40.

41. Ho S, Shapiro B. Skyline-plot Methods for Estimating Demographic History from Nucleotide Sequences. *Mol Ecol Res.* 2011;11:423–34.
42. Karcher MD, Palacios JA, Bedford T, Suchard MA, Minin VN. Quantifying and Mitigating the Effect of Preferential Sampling on Phylodynamic Inference. *PLOS Computational Biology.* 2016;12(3):1–19. doi:10.1371/journal.pcbi.1004789.
43. Fraser C, Cummings D, Klinkenberg D, et al. Influenza Transmission in Households During the 1918 Pandemic. *Am J Epidemiol.* 2011;174(5):505–14.
44. Wallinga J, Lipsitch M. How generation intervals shape the relationship between growth rates and reproductive numbers. *Proc R Soc B.* 2007;274:599–604.
45. Pybus OG, Rambaut A, Harvey PH. An Integrated Framework for the Inference of Viral Population History From Reconstructed Genealogies. *Genetics.* 2000;155(3):1429–1437.
46. Parag KV, Donnelly CA. Adaptive Estimation for Epidemic Renewal and Phylogenetic Skyline Models. *Systematic Biology.* 2020;69(6):1163–1179. doi:10.1093/sysbio/syaa035.
47. Gupta A, Manceau M, Vaughan T, Khammash M, Stadler T. The probability distribution of the reconstructed phylogenetic tree with occurrence data. *Journal of Theoretical Biology.* 2020;488:110115. doi:<https://doi.org/10.1016/j.jtbi.2019.110115>.
48. Stadler T. Sampling-through-time in birth-death trees. *Journal of Theoretical Biology.* 2010;267(3):396–404. doi:<https://doi.org/10.1016/j.jtbi.2010.09.010>.
49. Manceau M, Gupta A, Vaughan T, Stadler T. The probability distribution of the ancestral population size conditioned on the reconstructed phylogenetic tree with occurrence data. *Journal of Theoretical Biology.* 2020; p. 110400. doi:<https://doi.org/10.1016/j.jtbi.2020.110400>.
50. Kendall DG. On the Generalized “Birth-and-Death” Process. *The Annals of Mathematical Statistics.* 1948;19(1):1–15. doi:10.1214/aoms/1177730285.

51. Vaughan TG, Leventhal GE, Rasmussen DA, Drummond AJ, Welch D, Stadler T. Estimating Epidemic Incidence and Prevalence from Genomic Data. *Molecular Biology and Evolution*. 2019;36(8):1804–1816. doi:10.1093/molbev/msz106.
52. Jones SP. Haskell 98 Language and Libraries: The Revised Report. Cambridge University Press; 2003.
53. Grassly NC, Fraser C. Mathematical models of infectious disease transmission. *Nature Reviews Microbiology*. 2008;6(6):477–487. doi:10.1038/nrmicro1845.
54. Gavryushkina A, Welch D, Stadler T, Drummond AJ. Bayesian Inference of Sampled Ancestor Trees for Epidemiology and Fossil Calibration. *PLOS Computational Biology*. 2014;10(12):1–15. doi:10.1371/journal.pcbi.1003919.
55. Poppinga A, Vaughan T, Stadler T, Drummond AJ. Inferring Epidemiological Dynamics with Bayesian Coalescent Inference: The Merits of Deterministic and Stochastic Models. *Genetics*. 2015;199(2):595–607. doi:10.1534/genetics.114.172791.
